# Supplementary material
Source: publisher figshare collection journal article supplement (https://acs.figshare.com/ndownloader/files/4676893)

# An Effective Enantioselective Route to the Platensimycin Core

Gojko Lalic and E. J. Corey\*

*Department of Chemistry and Chemical Biology  
Harvard University, 12 Oxford Street, Cambridge, Massachusetts 02138*

## Supplementary Materials

**Materials and Methods.** Unless stated otherwise, reactions were performed in flame-dried glassware under a positive pressure of nitrogen using freshly distilled dry solvents. Thin-layer chromatography (TLC) was performed using E. Merck silica gel 60 F<sub>254</sub> precoated plates (0.25  $\mu$ m). Flash chromatography was performed using Baker silica gel (40  $\mu$ m particle size) and a Biotage SP1. NMR spectra were recorded on Varian Inova-500, or Inova-600 instruments and calibrated using residual undeuterated solvent as an internal reference. IR spectra were recorded on Avatar 360 FTIR spectrometer. Low-resolution and high-resolution mass spectral analyses were performed at the Harvard University Mass Spectrometry Center. Analytical high performance liquid chromatography (HPLC) was performed on an Isco 2350 Series or a Waters 626 HPLC using the indicated chiral column. Commercial grade reagents and solvents were used without further purification except as indicated below. Dichloromethane was distilled from CaH<sub>2</sub>. Toluene, Et<sub>2</sub>O and THF were purified by Seco Solvent Systems.

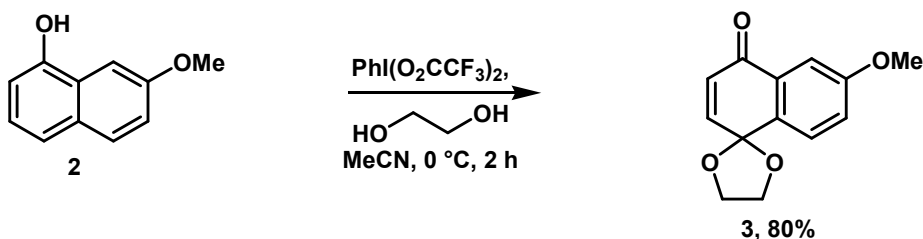

**Enone 3:** A solution of known phenol **2**<sup>1</sup> (7.90 g, 1.00 equiv, 45.3 mmol) in 150 mL of MeCN was added over a two hour period to a solution of PhI(O<sub>2</sub>CCF<sub>3</sub>)<sub>2</sub> (42.9 g, 2.20 equiv, 99.6 mmol) in ethyleneglycol (350 mL) and MeCN (100 mL) at 0 °C. After the addition was completed, aq. NaHCO<sub>3</sub> was added to the reaction mixture. The product was extracted with ether, and the extract was washed with brine, dried over anhydrous MgSO<sub>4</sub>, filtered, and concentrated under reduced pressure. The crude product was purified by column chromatography (7% to 60% EtOAc in hexane) to yield **3** (7.9 g, 80% yield) as a yellow amorphous powder; FT-IR (thin film): 2961, 2891, 1670, 1313, 1288, 1108, 1023, 944 cm<sup>-1</sup>; <sup>1</sup>H NMR (500 MHz, CDCl<sub>3</sub>): δ 7.44-7.41 (m, 2H), 7.07 (dd, *J*<sub>1</sub> = 9 Hz, *J*<sub>2</sub> = 3 Hz, 1H), 6.73 (dd, *J*<sub>1</sub> = 10 Hz, *J*<sub>2</sub> = 0.5 Hz, 1H), 6.24 (dd, *J*<sub>1</sub> = 10 Hz, *J*<sub>2</sub> = 0.5 Hz, 1H), 4.27-4.24 (m, 2H), 4.17-4.14 (m, 2H), 3.77 (s, 3H); <sup>13</sup>C NMR (100 MHz, CDCl<sub>3</sub>): δ 184.3, 160.7, 143.1, 133.3, 132.4, 128.8, 128.5, 121.5, 108.9, 100.4, 66.0, 55.9; LRMS (ESI<sup>+</sup>) *m/z* calc'd C<sub>13</sub>H<sub>13</sub>O<sub>4</sub><sup>+</sup> [M+H]<sup>+</sup>: 233.08, found 233.08.

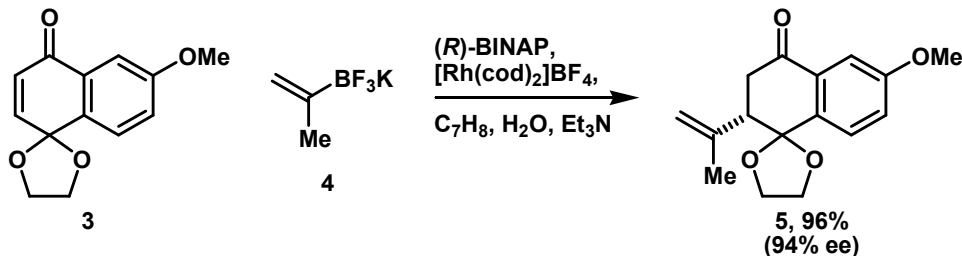

**Ketone 5:** To a Schlenk tube were added potassium trifluoroborate **4**<sup>2</sup> (5.30 g, 2.00 equiv, 36.2 mmol), **3** (4.20 g, 1.00 equiv, 18.08 mmol), (*S*)-BINAP (0.248 g, 0.022 equiv, 0.398 mmol) and Rh(cod)<sub>2</sub>BF<sub>4</sub> (0.147 g, 0.02 equiv, 0.362 mmol). The tube was evacuated and filled with nitrogen three times. To the mixture was then added Et<sub>3</sub>N (10.1 mL, 4.00 equiv, 72.3 mmol), followed by toluene (65 mL) and degassed H<sub>2</sub>O (16 mL). The Schlenk tube was sealed with a

teflon stopper and the reaction mixture was stirred at room temperature. After 36 h, the reaction mixture was poured to a mixture of ether and sat. aq.  $\text{NH}_4\text{Cl}$ . The organic layer was washed with brine, dried over  $\text{MgSO}_4$ , filtered and concentrated under reduced pressure. The crude product was purified by silica gel chromatography (4% to 30% EtOAc in hexane) to yield product **5** as a colorless oil (4.76 g, 96% yield, 94 % ee); HPLC (Chiralpac AD column, 3% *i*-PrOH/hexanes, 1.0 mL/min, 230 nm,  $t_{\text{major}} = 14.8$  min,  $t_{\text{minor}} = 11.9$  min; ee = 94%);  $[\alpha]_{\text{D}}^{23} = +8.3$  ( $c = 1.01$ ,  $\text{CHCl}_3$ ); FT-IR (thin film): 3076, 2953, 1683, 1282, 1249, 1031  $\text{cm}^{-1}$ ;  $^1\text{H}$  NMR (500 MHz,  $\text{CDCl}_3$ ):  $\delta$  7.48-7.45 (m, 2H), 7.13 (dd,  $J_1 = 8$  Hz,  $J_2 = 3$  Hz, 1H), 4.98-4.97 (m, 1H), 4.84 (s, 1H), 4.23-4.21 (m, 1H), 4.15-4.02 (m, 3H), 3.84 (s, 3H), 3.11-3.07 (m, 2H), 2.93-2.88 (m, 1H), 1.82 (s, 3H);  $^{13}\text{C}$  NMR (125 MHz,  $\text{CDCl}_3$ ):  $\delta$  197.4, 160.3, 143.4, 136.5, 133.2, 126.6, 121.8, 115.6, 109.4, 108.1, 66.5, 65.4, 55.8, 50.4, 41.9, 23.6; HRMS (ESI $^+$ )  $m/z$  calc'd  $\text{C}_{16}\text{H}_{19}\text{O}_4^+$   $[\text{M}+\text{H}]^+$ : 275.1283, found 275.1281.

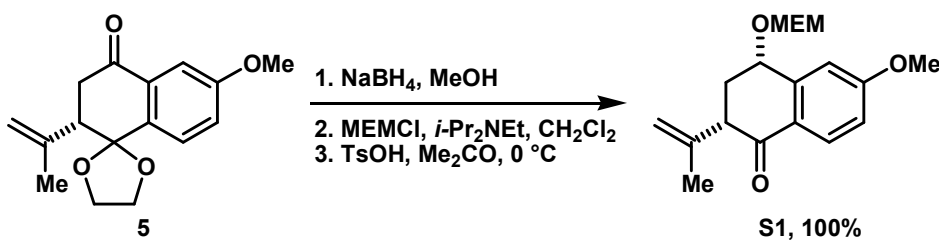

**Ketone S1:** To a solution of **5** (4.96 g, 1.00 equiv, 18.08 mmol) in MeOH (50 mL) was added  $\text{NaBH}_4$  (0.68 g, 1.00 equiv, 18.08 mmol). After 1 h, the reaction mixture was concentrated under reduced pressure. To the residue was added sat. aq.  $\text{NH}_4\text{Cl}$  solution and the product was extracted with ether. The organic extract was washed with brine, dried over  $\text{MgSO}_4$ , filtered, and concentrated under reduced pressure. The resulting crude alcohol was dissolved in  $\text{CH}_2\text{Cl}_2$  (60 mL) and was added to a Schlenk tube containing TBAI (0.67 g, 0.10 equiv, 1.81 mmol). To the resulting solution was added Hünig's base (12.6 mL, 4.00 equiv, 72.3 mmol), followed by MEMCl (4.10 mL, 2.00 equiv, 36.2 mmol). The tube was sealed and placed into an oil bath at 80  $^\circ\text{C}$ . After 2 h, the reaction mixture was poured in to a separatory funnel containing 0.1 M HCl, and the product was extracted with ether. The organic layer was washed with saturated aq.  $\text{NaHCO}_3$  and brine, dried over  $\text{MgSO}_4$ , filtered, and concentrated. The crude product was dissolved in acetone (150 mL) and to the resulting solution was added *p*-TsOH (6.60 g, 1.90 equiv, 34.7 mmol). The reaction mixture was stirred at room temperature and after

10 min saturated aq. NaHCO<sub>3</sub> was added. Acetone was removed from the reaction mixture under reduced pressure and the product was extracted with ether. The organic extract was washed with brine, dried over MgSO<sub>4</sub>, filtered, and concentrated under reduced pressure to yield crude ketone **S1** in quantitative yield. The crude product was used without further purification in the next step while a small portion of the material was purified by column chromatography to yield ketone **S1** as a white amorphous powder. FT-IR (thin film): 2927, 2877, 1675, 1597, 1237, 1101, 1021 cm<sup>-1</sup>; <sup>1</sup>H NMR (500 MHz, CDCl<sub>3</sub>): δ 8.01 (d, *J* = 9 Hz, 1H), 7.12 (d, *J* = 1.5 Hz, 1H), 6.88 (dd, *J*<sub>1</sub> = 9 Hz, *J*<sub>2</sub> = 1.5 Hz, 1H), 5.10 (d, *J* = 7 Hz, 1H), 5.00-4.97 (m, 3H), 4.87 (s, 1H), 3.88-3.85 (m, 5H), 3.61-3.60 (m, 2H), 3.39 (s, 3H), 3.21 (dd, *J*<sub>1</sub> = 14 Hz, *J*<sub>2</sub> = 4 Hz, 1H), 2.55-2.52 (m, 1H), 2.22-2.12 (m, 1H), 1.77 (s, 3H); <sup>13</sup>C NMR (100 MHz, CDCl<sub>3</sub>): δ 195.6, 164.2, 147.4, 143.5, 130.3, 125.2, 114.8, 114.2, 110.1, 95.1, 74.0, 72.0, 67.8, 59.3, 55.7, 54.5, 36.2, 20.3; HRMS (ESI<sup>+</sup>) *m/z* calc'd C<sub>18</sub>H<sub>25</sub>O<sub>5</sub><sup>+</sup> [M+H]<sup>+</sup>: 321.1696, found 321.1684.

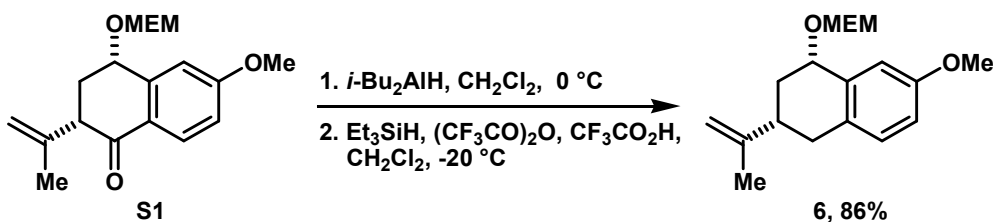

**MEM-Ether 6:** To a solution of **S1** (5.80 g, 1.00 equiv, 18.08 mmol) in CH<sub>2</sub>Cl<sub>2</sub> (120 mL) was added 1M solution of *i*-Bu<sub>2</sub>AlH (36.2 mL, 2.00 equiv, 36.2 mmol) in hexane, at 0 °C. The appearance of the reaction mixture during the addition changes from colorless, to yellow, to colorless and the addition was stopped after the first drop that makes the reaction mixture colorless. The reaction was then quenched with a saturated aqueous solution of sodium potassium tartarate (200 mL) and the biphasic mixture was vigorously stirred for 2 hours at room temperature. The product was extracted from the reaction mixture with ether and the extract was washed with brine, dried over MgSO<sub>4</sub>, filtered, and concentrated under reduced pressure to yield 5.40 g (92% yield) of the crude alcohol that was used in the following step without further purification.

To a cooled solution (−20 °C) of the alcohol (5.40 g, 1.00 equiv, 16.8 mmol) in CH<sub>2</sub>Cl<sub>2</sub> (85 mL) was added triethylsilane (21.4 mL, 8.00 equiv, 134 mmol), and trifluoroacetic anhydride (3.03 mL, 1.30 equiv, 21.8 mmol), followed by a slow addition of trifluoroacetic acid (0.65 mL,

0.50 equiv, 8.37 mmol). After 3 h at  $-20\text{ }^{\circ}\text{C}$ , the reaction mixture was warmed to  $0\text{ }^{\circ}\text{C}$  and after an additional 0.5 hours sat. aq.  $\text{NaHCO}_3$  solution was added. The product was extracted from the reaction mixture with ether and the extract was washed with brine, dried over  $\text{MgSO}_4$ , filtered, and concentrated under reduced pressure. The crude product was purified by column chromatography over silica gel (5% to 30% EtOAc in hexane) to yield **6** (4.41 g, 86% yield) as a colorless oil;  $[\alpha]_{\text{D}}^{23} = +61.1$  ( $c = 1.20$ ,  $\text{CHCl}_3$ ); FT-IR (thin film): 2953, 1262, 1104, 1033  $\text{cm}^{-1}$ ,  $^1\text{H}$  NMR (500 MHz,  $\text{CDCl}_3$ ):  $\delta$  7.03 (d,  $J = 3$  Hz, 1H), 7.00 (d,  $J = 8$  Hz, 1H), 6.76 (dd,  $J_1 = 7$  Hz,  $J_2 = 3$  Hz, 1H), 5.06 (d,  $J = 7$  Hz, 1H), 4.93 (d,  $J = 7$  Hz, 1H), 4.85-4.79 (m, 3H), 3.89-3.85 (m, 2H), 3.84 (s, 3H), 3.62-3.60 (m, 2H), 3.41 (s, 3H), 2.76-2.67 (m, 2H), 2.45-2.40 (m, 2H), 1.80 (s, 3H), 1.66-1.61 (m, 1H);  $^{13}\text{C}$  NMR (100 MHz,  $\text{CDCl}_3$ ):  $\delta$  158.3, 148.9, 138.6, 129.9, 129.2, 113.9, 111.8, 109.7, 95.0, 76.1, 72.1, 67.5, 59.3, 55.5, 40.8, 35.4, 34.5, 20.8; HRMS (ESI $^+$ )  $m/z$  calc'd for  $\text{C}_{18}\text{H}_{26}\text{KO}_4^+$   $[\text{M}+\text{K}]^+$ : 345.1468, found 345.1449.

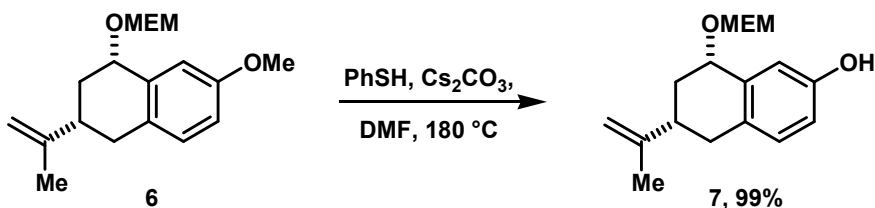

**Phenol 7:** To a Schlenk tube was added  $\text{Cs}_2\text{CO}_3$  (5.32 g, 2.50 equiv, 16.3 mmol) and **6** (2.00 g, 1.00 equiv, 6.53 mmol) as a solution in degassed anhydrous DMF (25 mL). To the resulting suspension was added thiophenol (1.34 mL, 2.00 equiv, 13.1 mmol), and the reaction mixture was placed in the oil bath preheated to  $180\text{ }^{\circ}\text{C}$ . After evolution of  $\text{CO}_2$  stopped, the tube was sealed with a teflon stopper and the reaction mixture was stirred at the same temperature. After 12 h, the reaction mixture was cooled to room temperature and sat. aq.  $\text{NH}_4\text{Cl}$  was added. The product was extracted with ether and the organic extract was washed with brine, dried over  $\text{MgSO}_4$ , filtered, and concentrated under reduced pressure. The crude product was purified by column chromatography over silica gel (10% to 50% EtOAc in Hexane) to yield phenol **7** (1.90 g, 99% yield) as a colorless oil.  $[\alpha]_{\text{D}}^{23} = +60.3$  ( $c = 1.00$ ,  $\text{CHCl}_3$ ); FT-IR (thin film): 3364 (br), 2922, 2884, 1091, 1033  $\text{cm}^{-1}$ ;  $^1\text{H}$  NMR (500 MHz,  $\text{CDCl}_3$ ):  $\delta$  7.03 (d,  $J = 2.5$  Hz, 1H), 6.94 (d,  $J = 8.5$  Hz, 1H), 6.68 (dd,  $J_1 = 8.5$  Hz,  $J_2 = 2.5$  Hz, 1H), 5.60 (s, 1H), 5.03 (d,  $J = 7.5$  Hz, 1H), 4.90 (d,  $J = 8.5$  Hz, 1H), 4.80-4.78 (m, 3H), 3.95-3.92 (m, 1H), 3.79-3.77 (m, 1H), 3.65-3.63 (m, 2H),

3.49 (s, 3H), 2.78-2.68 (m, 1H), 2.66-2.62 (m, 1H), 2.40-2.37 (m, 2H), 1.79 (s, 3H), 1.63-1.61 (m, 1H);  $^{13}\text{C}$  NMR (100 MHz,  $\text{CDCl}_3$ ):  $\delta$  154.5, 148.9, 138.6, 130.0, 128.9, 114.9, 113.9, 109.7, 95.3, 76.8, 72.3, 67.6, 59.4, 40.9, 35.5, 34.5, 20.8; HRMS ( $\text{ESI}^+$ )  $m/z$  calc'd for  $\text{C}_{17}\text{H}_{28}\text{NO}_4^+$   $[\text{M}+\text{NH}_4]^+$ : 310.2013, found 310.2023.

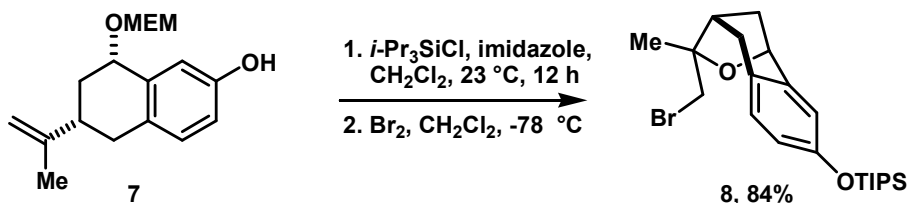

**Bromo ether 8:** To a solution of **7** (1.79 g, 1.00 equiv, 6.13 mmol) and imidazole (0.773 g, 2.00 equiv, 12.3 equiv) in  $\text{CH}_2\text{Cl}_2$  (15 mL) was added TIPSCl (1.44 mL, 1.10 equiv, 6.74 mmol) at room temperature. After 16 h, the reaction mixture was diluted with ether and was washed with 0.1 M HCl, sat. aq.  $\text{NaHCO}_3$ , and brine. The organic extract was dried over  $\text{MgSO}_4$ , filtered and concentrated under reduced pressure. The crude reaction product was dissolved in  $\text{CH}_2\text{Cl}_2$  (60 mL) and to the resulting solution, cooled to  $-78^\circ\text{C}$ , was slowly added a solution of  $\text{Br}_2$  in  $\text{CH}_2\text{Cl}_2$  (10% v/v). After the addition was completed sat. aq.  $\text{Na}_2\text{S}_2\text{O}_3$  was added and the reaction mixture was warmed to room temperature. The resulting solution was extracted with ether and the organic extract was washed with brine, dried over  $\text{MgSO}_4$ , filtered, and concentrated under reduced pressure. The crude product was purified by column chromatography over silica gel (2% to 12% EtOAc in hexane) to yield **8** as an inseparable mixture of diastereoisomers (>10:1) (2.25 g, 84% yield).  $[\alpha]_{\text{D}}^{23} = +113.1$  ( $c = 1.01$ ,  $\text{CHCl}_3$ ); FT-IR (thin film): 2943, 2866, 1272, 880  $\text{cm}^{-1}$ ;  $^1\text{H}$  NMR (500 MHz,  $\text{C}_6\text{D}_6$ ):  $\delta$  6.76-6.77 (m, 2H), 6.70 (t,  $J = 1.5$  Hz, 1H), 4.59 (d,  $J = 4.5$  Hz, 1H), 3.19-3.21 (m, 2H), 3.16 (d,  $J = 17.5$  Hz, 1H), 2.66 (dd,  $J_1 = 17.5$  Hz,  $J_2 = 4$  Hz, 1H), 2.13-2.17 (m, 1H), 2.04-2.11 (m, 1H), 1.55 (d,  $J = 11.5$  Hz, 1H), 1.34 (s, 3H), 1.12-1.20 (m, 3H), 1.12-1.04 (m, 18H);  $^{13}\text{C}$  NMR (100 MHz,  $\text{C}_6\text{D}_6$ ):  $\delta$  154.4, 142.3, 129.8, 126.7, 119.8, 118.7, 84.2, 78.5, 41.7, 38.6, 35.1, 31.5, 26.3, 18.1, 13.0; HRMS ( $\text{ESI}^+$ )  $m/z$  calc'd for  $\text{C}_{22}\text{H}_{36}\text{BrO}_2\text{Si}^+$   $[\text{M}+\text{H}]^+$ : 439.1662, found 439.1669.

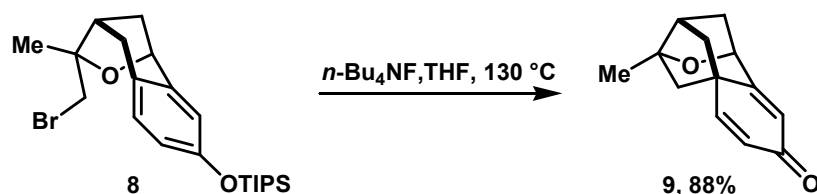

**Dienone 9:** To a solution of **8** (3.77 g, 1.00 equiv, 8.58 mmol) in THF (60 mL) in a Schlenk flask was added 1M solution of TBAF in THF (10.3 mL, 1.20 equiv, 10.3 mmol) at room temperature. The flask was sealed and placed in a 130 °C oil bath. After 4 h, the reaction mixture was cooled to room temperature, diluted with EtOAc, and washed with sat. aq.  $\text{NH}_4\text{Cl}$  and brine. The aqueous phase was extracted with EtOAc, and the combined organic extracts were dried over  $\text{MgSO}_4$ , filtered, and concentrated under reduced pressure. The crude product was purified by column chromatography (10% to 80% EtOAc in hexane) to yield **9** as a white amorphous powder (1.53 g, 88% yield).  $[\alpha]_{\text{D}}^{23} = +33.7$  ( $c = 1.25$ ,  $\text{CHCl}_3$ ); FT-IR (thin film): 2963, 1655, 1626, 1147  $\text{cm}^{-1}$ ;  $^1\text{H}$  NMR (500 MHz,  $\text{CDCl}_3$ ):  $\delta$  6.66 (d,  $J = 10$  Hz, 1H), 6.31 (dd,  $J_1 = 10$  Hz,  $J_2 = 2$  Hz, 1H), 6.11 (d,  $J = 10$  Hz, 1H), 4.71 (d,  $J = 5$  Hz, 1H), 2.58 (t,  $J = 6$  Hz, 1H), 2.26-2.20 (m, 1H), 2.14-2.19 (m, 1H), 1.92-1.99 (m, 2H), 1.77 (d,  $J = 11.5$  Hz, 1H), 1.72-1.50 (m, 4H);  $^{13}\text{C}$  NMR (100 MHz,  $\text{CDCl}_3$ ):  $\delta$  187.1, 160.4, 150.9, 130.0, 121.8, 87.1, 80.0, 54.8, 49.9, 48.6, 44.4, 42.5, 22.2; LRMS ( $\text{ESI}^+$ )  $m/z$  calc'd for  $\text{C}_{13}\text{H}_{15}\text{O}_2^+ [\text{M}+\text{H}]^+$ : 203.11, found 203.11.

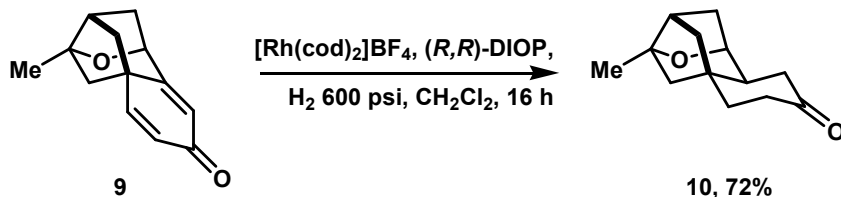

**Ketone 10:** To a flask containing **9** (0.60 g, 1.00 equiv, 2.97 mmol),  $[\text{Rh}(\text{cod})_2]\text{BF}_4$  (0.24 g, 0.20 equiv, 0.59 mmol) and (4*R*,5*R*)-DIOP (0.30 g, 0.20 equiv, 0.59 mmol) was added  $\text{CH}_2\text{Cl}_2$  (60 mL). The flask was quickly transferred to a hydrogenation apparatus. The hydrogenation apparatus was flushed with hydrogen three times and filled with 600 psi of hydrogen. After 12 h the reaction mixture was placed under a nitrogen atmosphere and Dess-Martin reagent was added in small portions until all of the alcohol byproduct (less than 0.1 equiv) disappeared. To the resulting reaction mixture was added silica gel (3 g) and the solvent was removed under reduced pressure. The desired product **10** was obtained after the column chromatography (5% to 60%  $\text{Et}_2\text{O}$  in hexane) as a white amorphous powder (0.44 g, 72% yield).  $[\alpha]_{\text{D}}^{23} = -10.8$  ( $c = 0.84$ ,

CHCl<sub>3</sub>); FT-IR (thin film): 2944, 1709, 1040 cm<sup>-1</sup>; <sup>1</sup>H NMR (500 MHz, CDCl<sub>3</sub>): δ 4.07 (t, *J* = 10 Hz, 1H), 2.40-2.29 (m, 3H), 2.26-2.22 (m, 2H), 2.12-2.02 (m, 2H), 1.90-1.78 (m, 3H), 1.68 (dd, *J*<sub>1</sub> = 11 Hz, *J*<sub>2</sub> = 3 Hz, 1H), 1.65-1.59 (m, 1H), 1.52 (d, *J* = 11 Hz, 1H), 1.43-1.40 (m, 4H); <sup>13</sup>C NMR (100 MHz, CDCl<sub>3</sub>): δ 210.6, 86.0, 79.2, 52.6, 45.1, 44.9, 44.3, 41.5, 39.9, 39.2, 37.0, 35.0, 23.1; HRMS (ESI<sup>+</sup>) *m/z* calc'd for C<sub>13</sub>H<sub>19</sub>O<sub>2</sub><sup>+</sup> [M+H]<sup>+</sup>: 207.1385, found 207.1380.

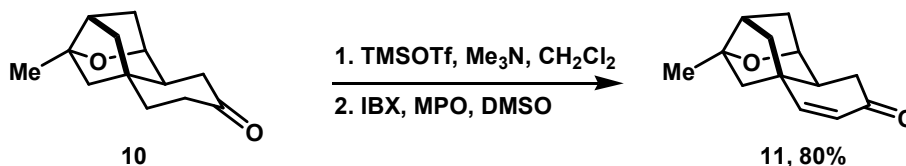

**Enone 11:** To a solution of **10** (0.054 g, 1.00 equiv, 0.262 mmol) and Me<sub>3</sub>N (0.15 mL, 6.00 equiv, 1.57 mmol) in CH<sub>2</sub>Cl<sub>2</sub> (2.6 mL) at 0 °C was added TMSOTf (0.14 mL, 3.00 equiv, 0.78 mmol). After 1.5 h pentane was added and the resulting mixture was extracted with aq. NaHCO<sub>3</sub> and brine, dried over Na<sub>2</sub>SO<sub>4</sub>, and concentrated under reduced pressure. The crude product was dissolved in DMSO (0.10 mL) and 0.4 M solution of IBX and MPO (4-Methoxy pyridine-*N*-oxide) in DMSO (0.98 mL, 1.5 equiv, 0.39 mmol) was added at room temperature. After 1.5 h, to the reaction mixture was added sat. aq. NaHCO<sub>3</sub> and the resulting solution was extracted with EtOAc. The organic extracts were combined and were extracted with brine, dried over MgSO<sub>4</sub>, filtered, and concentrated under reduced pressure. The crude product obtained as a 7.2:1 mixture of regioisomers was purified by column chromatography (4% to 60% EtOAc in benzene) to yield **11** (0.043 g, 80% yield, 98% ee) as a white solid. HPLC (Chiralpac AD-H column, 2% *i*-PrOH/hexanes, 1.0 mL/min, 230 nm, *t*<sub>major</sub> = 16.3 min, *t*<sub>minor</sub> = 18.4 min; ee = 98%); [α]<sub>D</sub><sup>23</sup> = -16.6 (*c* = 1.00, CHCl<sub>3</sub>); FT-IR (thin film): 2948, 1674, 1137, 1082, 1036 cm<sup>-1</sup>; <sup>1</sup>H NMR (500 MHz, CDCl<sub>3</sub>): δ 6.62 (d, *J* = 10.0 Hz, 1H), 5.94 (d, *J* = 10.0 Hz, 1H), 4.16 (dd, *J*<sub>1</sub> = 3.4 Hz, *J*<sub>2</sub> = 3.4 Hz, 1H), 2.44-2.27 (m, 4H), 1.97-1.92 (m, 2H), 1.89 (d, *J* = 11.5 Hz, 1H), 1.78-1.73 (m, 2H), 1.66 (d, *J* = 11 Hz, 1H), 1.44 (s, 3H); <sup>13</sup>C NMR (120 MHz, CDCl<sub>3</sub>): δ = 199.1, 155.2, 128.9, 87.0, 79.0, 51.7, 46.2, 44.1, 42.7, 42.2, 37.9, 37.5, 23.1; LRMS (ESI<sup>+</sup>) *m/z* calc'd for C<sub>13</sub>H<sub>17</sub>O<sub>2</sub><sup>+</sup> [M+H]<sup>+</sup>: 205.12, found 205.12.

## References:

- (1) Hulme, A. N.; Henry, S. S.; Meyers, A. I. *J. Org. Chem.* **1995**, *60*, 1265-1270.



- (2) Molander, G. A.; Ribagorda, M. *J. Org. Chem.* **2003**, *125*, 11148-11149.

gl1\_262\_5c cdcl3 5c

Data Collected on:  
nmrsun2-inova500  
Archive directory:  
/export/home/ds2/vnmrsys/data  
Sample directory:

File: gl1\_262\_5c

Pulse sequence: s2pul  
Solvent: CDCl3

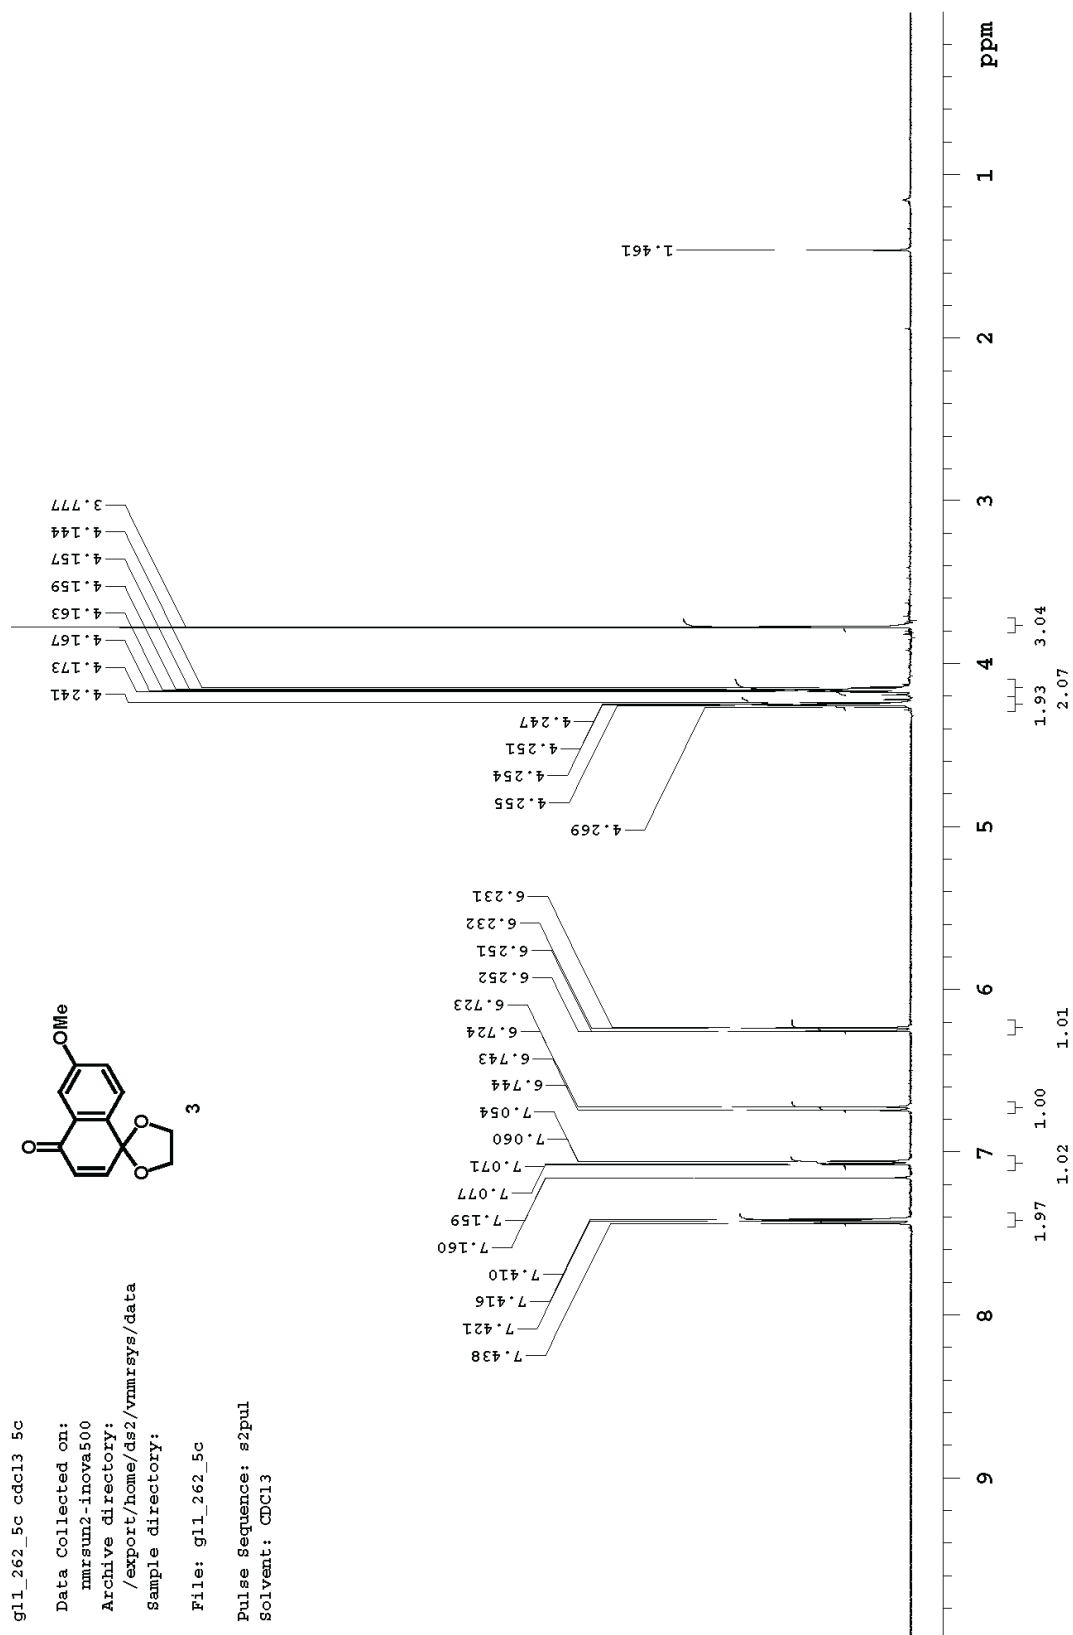

g15\_3 cdcl3 5c

Data Collected on:  
nmrsun2-inova500  
Archive directory:  
/export/home/ds2/vnmrsys/data  
Sample directory:

File: cg11\_262\_5c

Pulse sequence: s2pul  
Solvent: CDCl3

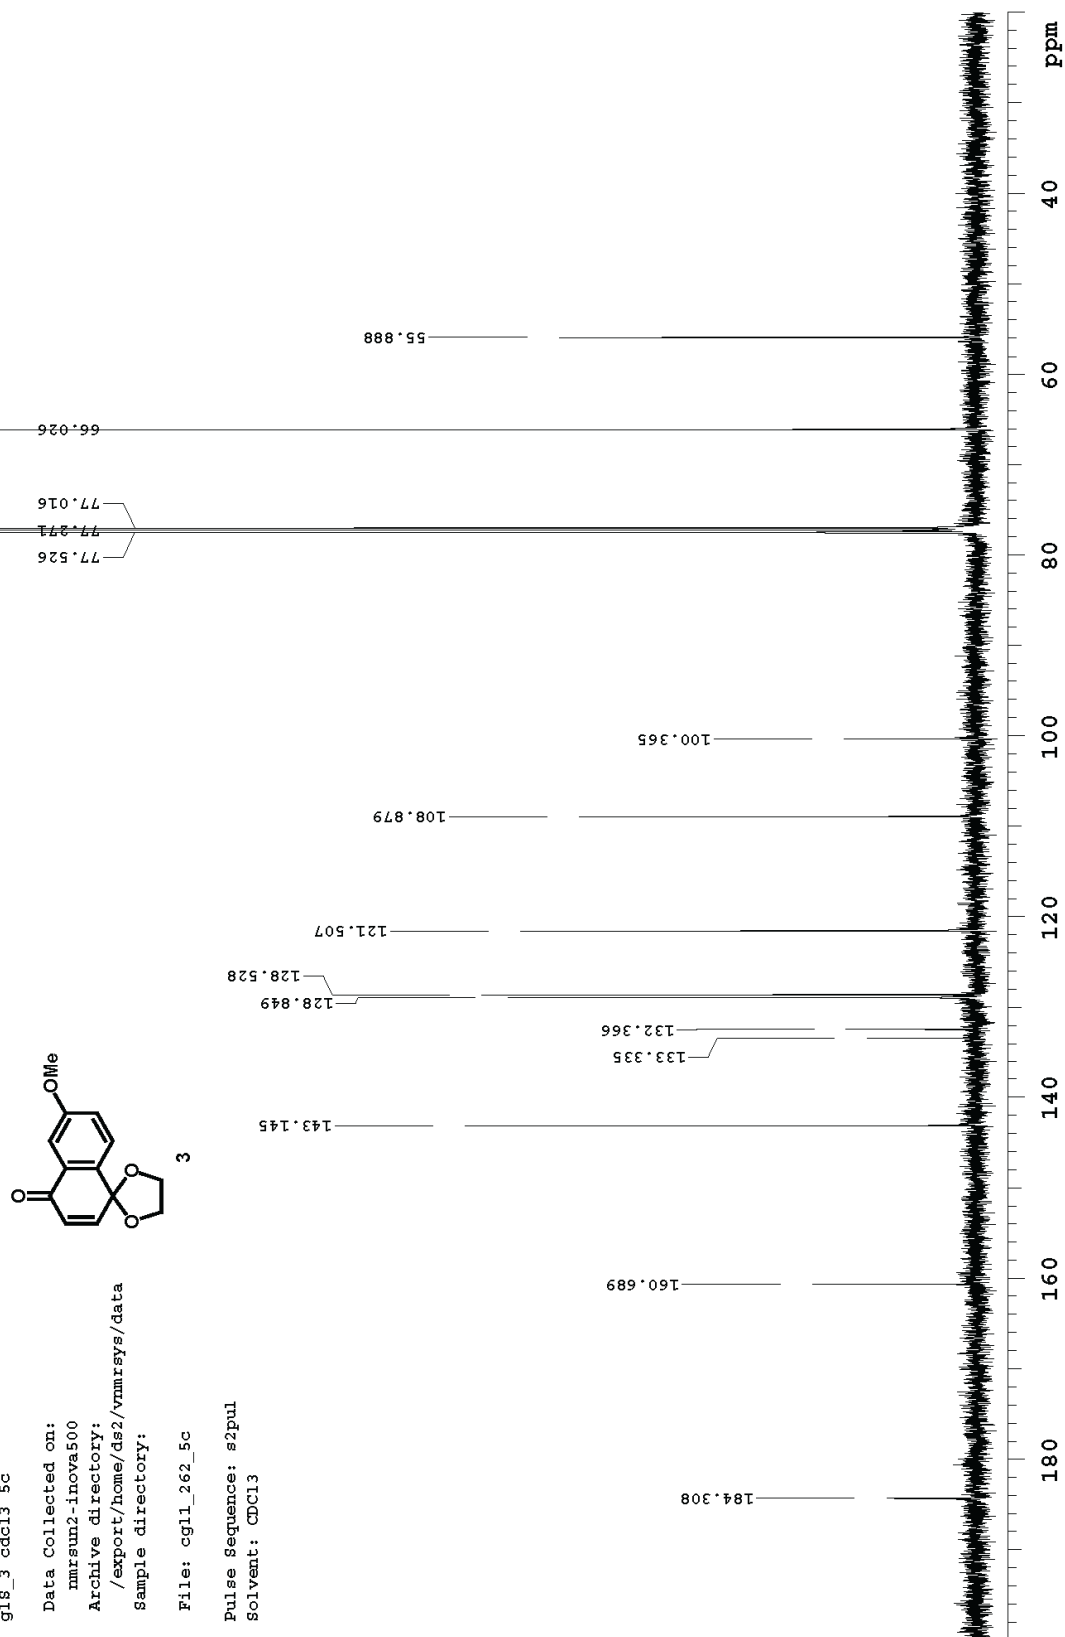

gl15\_5 cdcl3 5c

Data Collected on:  
nmrsun2-inova500  
Archive directory:  
/export/home/ds2/vnmrsys/data  
Sample directory:

File: gl1\_264\_5c

Pulse sequence: s2pul  
Solvent: CDCl3

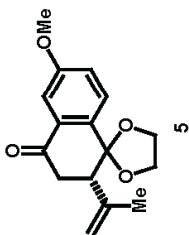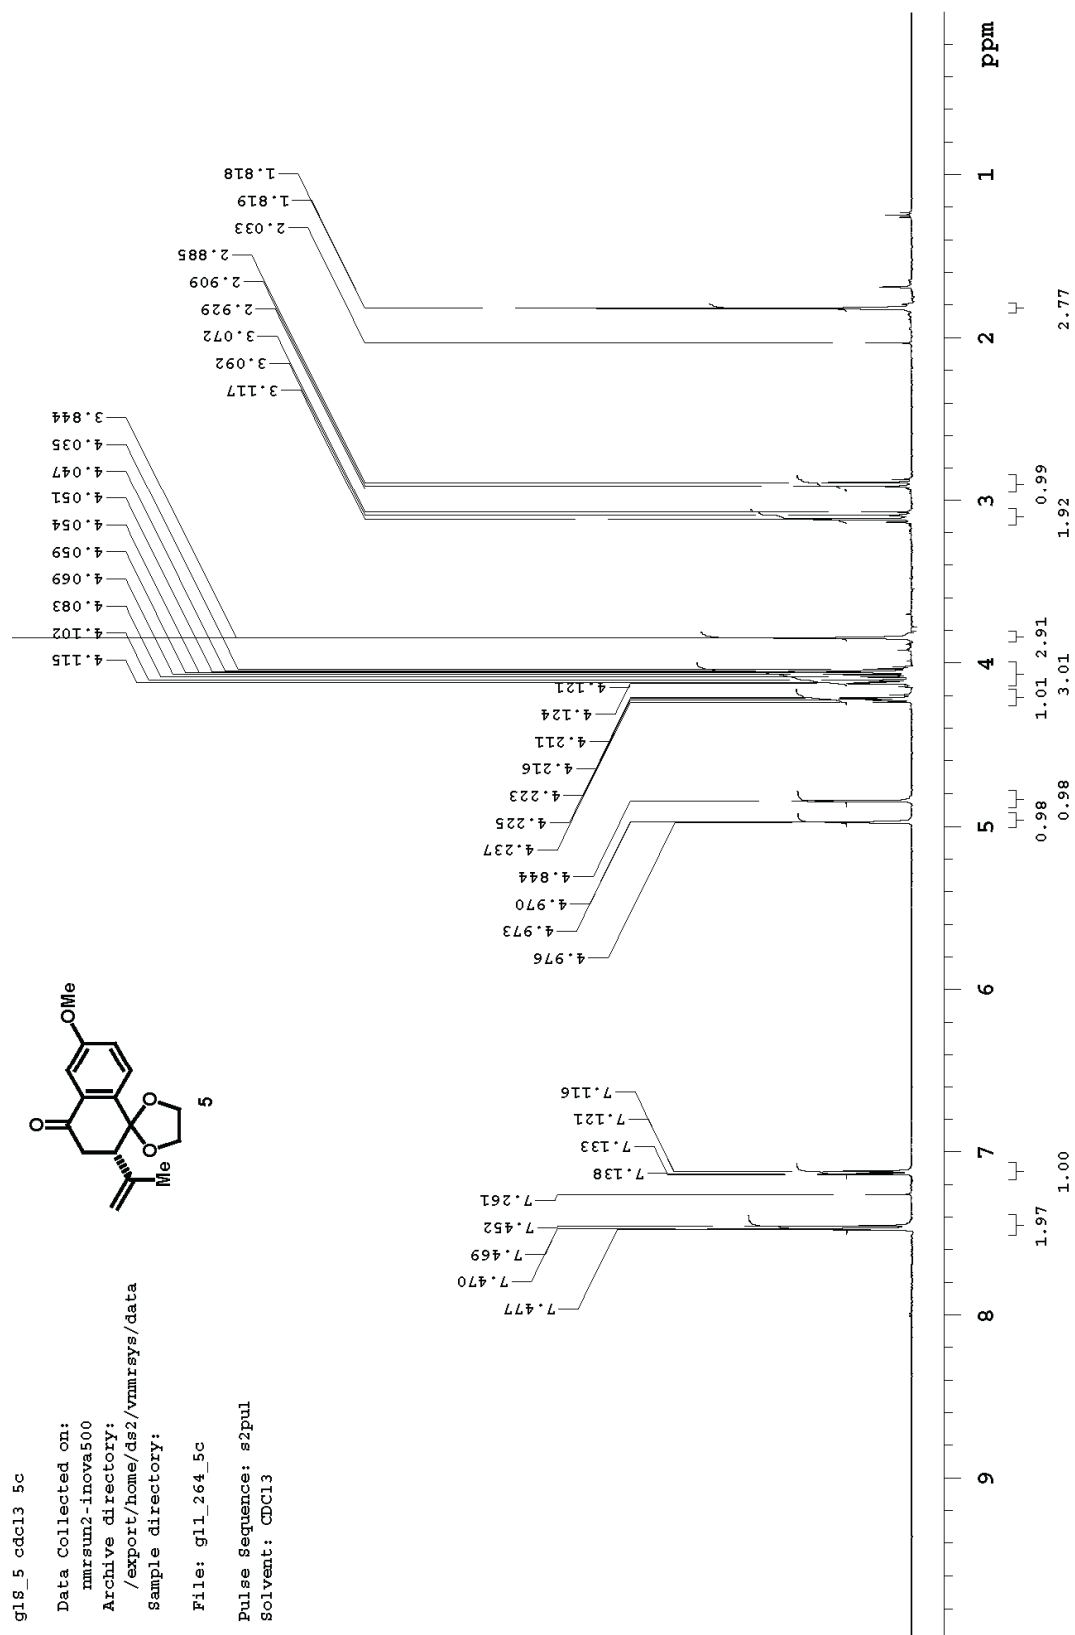

cg1s\_5 cdcl3 5c

Data Collected on:  
nmrsun2-inova500  
Archive directory:  
/export/home/ds2/vnmrsys/data  
Sample directory:

File: cg11\_264\_5c

Pulse sequence: s2pul  
Solvent: CDCl3

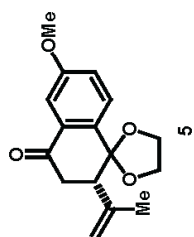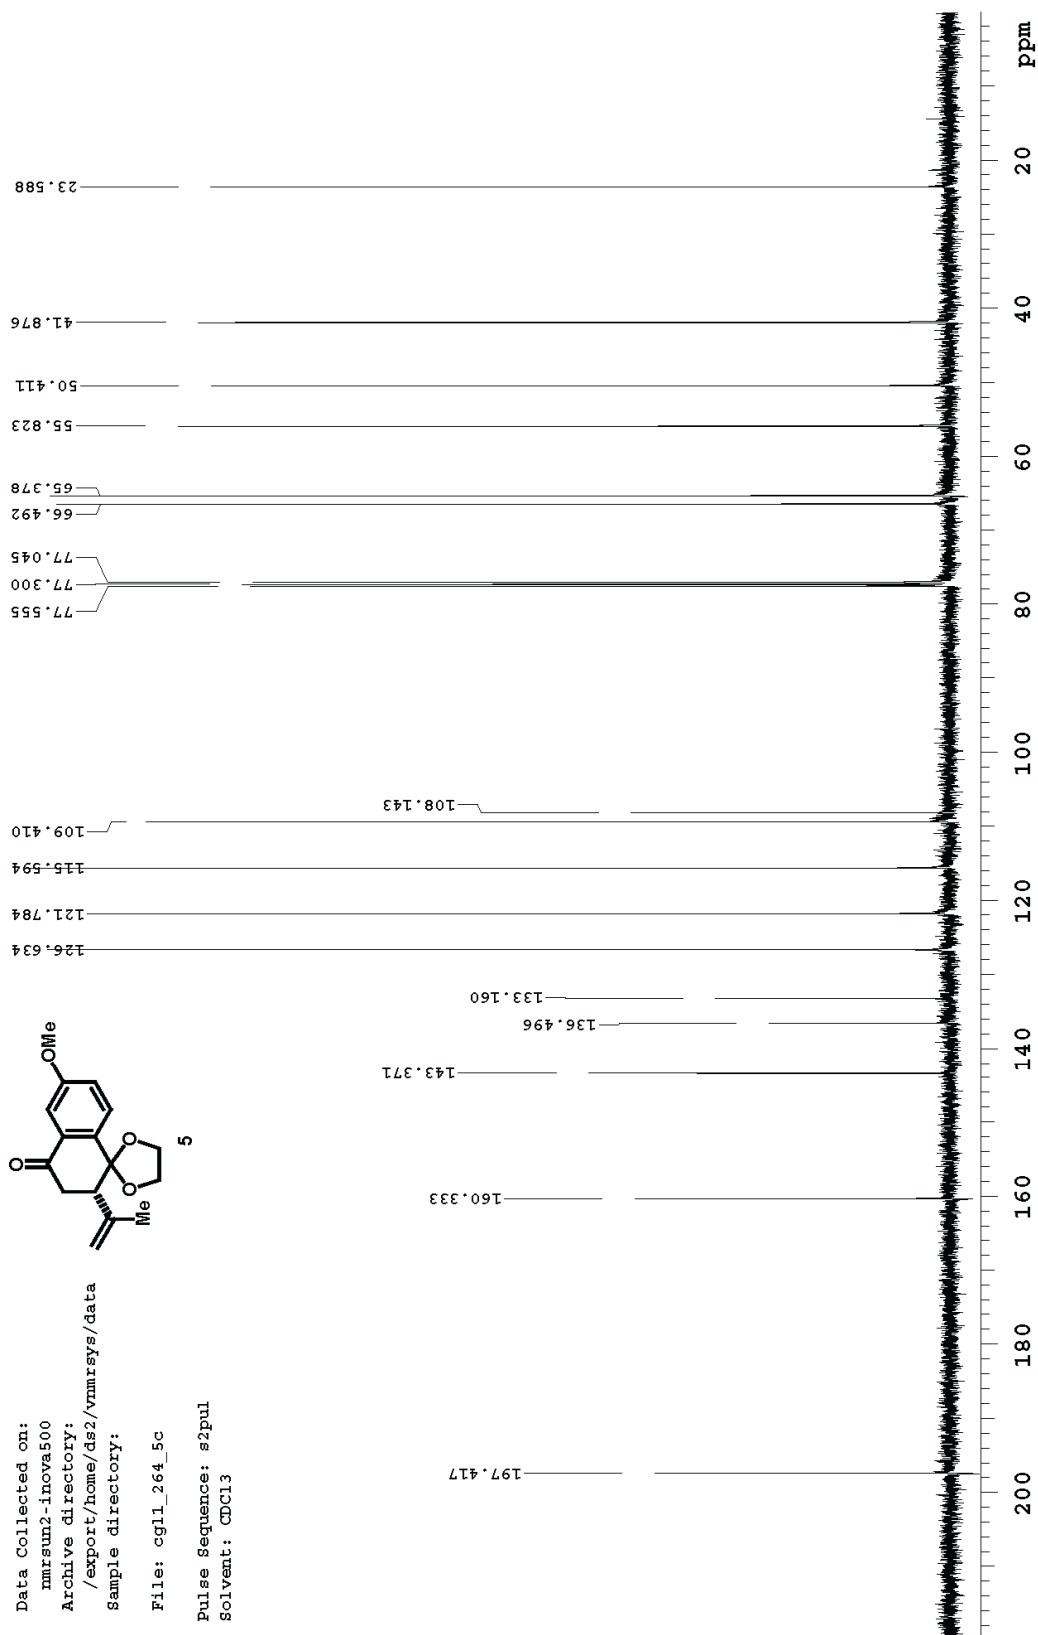

=====

|                 |                                       |           |          |
|-----------------|---------------------------------------|-----------|----------|
| Injection Date  | : 8/7/2007 4:04:14 PM                 | Seq. Line | : 1      |
| Sample Name     | : Scheme_5                            | Location  | : Vial 1 |
| Acq. Operator   | : G1                                  | Inj       | : 1      |
| Acq. Instrument | : Instrument 1                        |           |          |
| Acq. Method     | : C:\HPCHEM\1\METHODS\LALIC\SCHEME5.M |           |          |
| Last changed    | : 8/7/2007 4:02:00 PM by G1           |           |          |
| Analysis Method | : C:\HPCHEM\1\DATA\BRIAN\WASH.M       |           |          |
| Last changed    | : 8/25/2007 10:26:59 AM by EDA        |           |          |

3% iPrOH in hexane AD

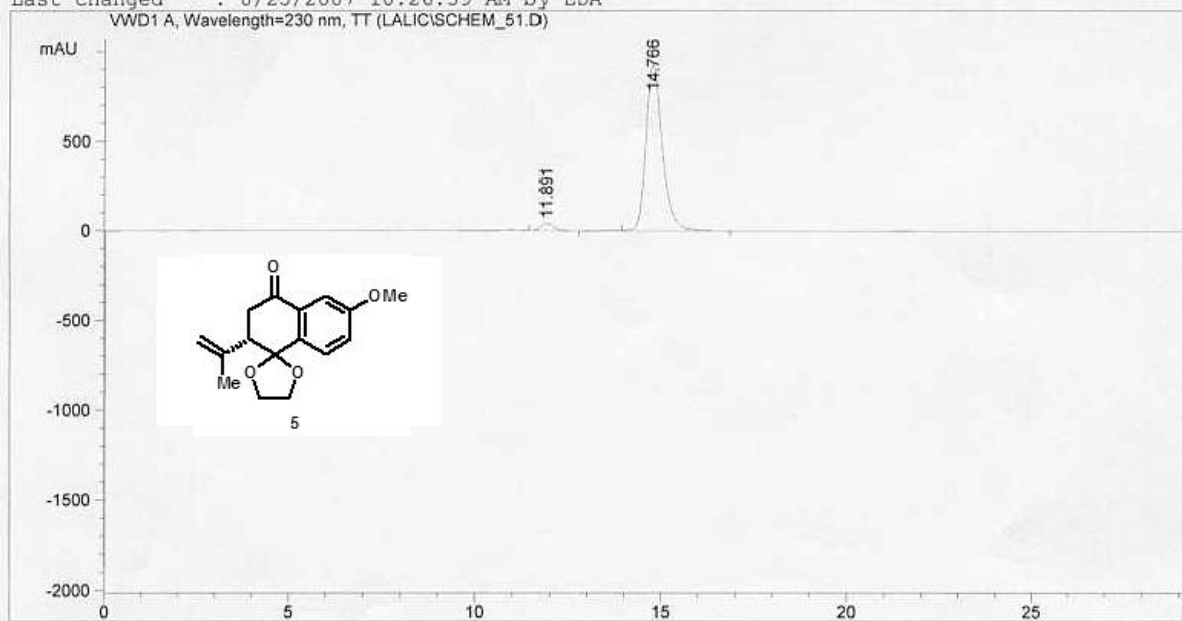

=====  
Area Percent Report  
=====

Sorted By : Signal  
Multiplier : 1.0000  
Dilution : 1.0000  
Use Multiplier & Dilution Factor with ISTDs

Signal 1: VWD1 A, Wavelength=230 nm, TT

| Peak # | RetTime [min] | Type | Width [min] | Area mAU  | Area *s   | Height [mAU] | Area % |
|--------|---------------|------|-------------|-----------|-----------|--------------|--------|
| 1      | 11.891        | VP   | 0.3536      | 988.25433 | 42.59863  | 3.3048       |        |
| 2      | 14.766        | VB   | 0.4717      | 2.89153e4 | 930.59106 | 96.6952      |        |

Totals : 2.99035e4 973.18969

Results obtained with enhanced integrator!

=====  
\*\*\* End of Report \*\*\*

gl15\_6 cdcl1 5c

Data directory: /export/home/ds2/vmr/sys/data  
 Archive directory: /export/home/ds2/vmr/sys/data  
 Sample directory: /export/home/ds2/vmr/sys/data

File: gl12\_288\_5c

Pulse sequence: s2pul

Solvent: CDCl3

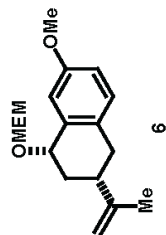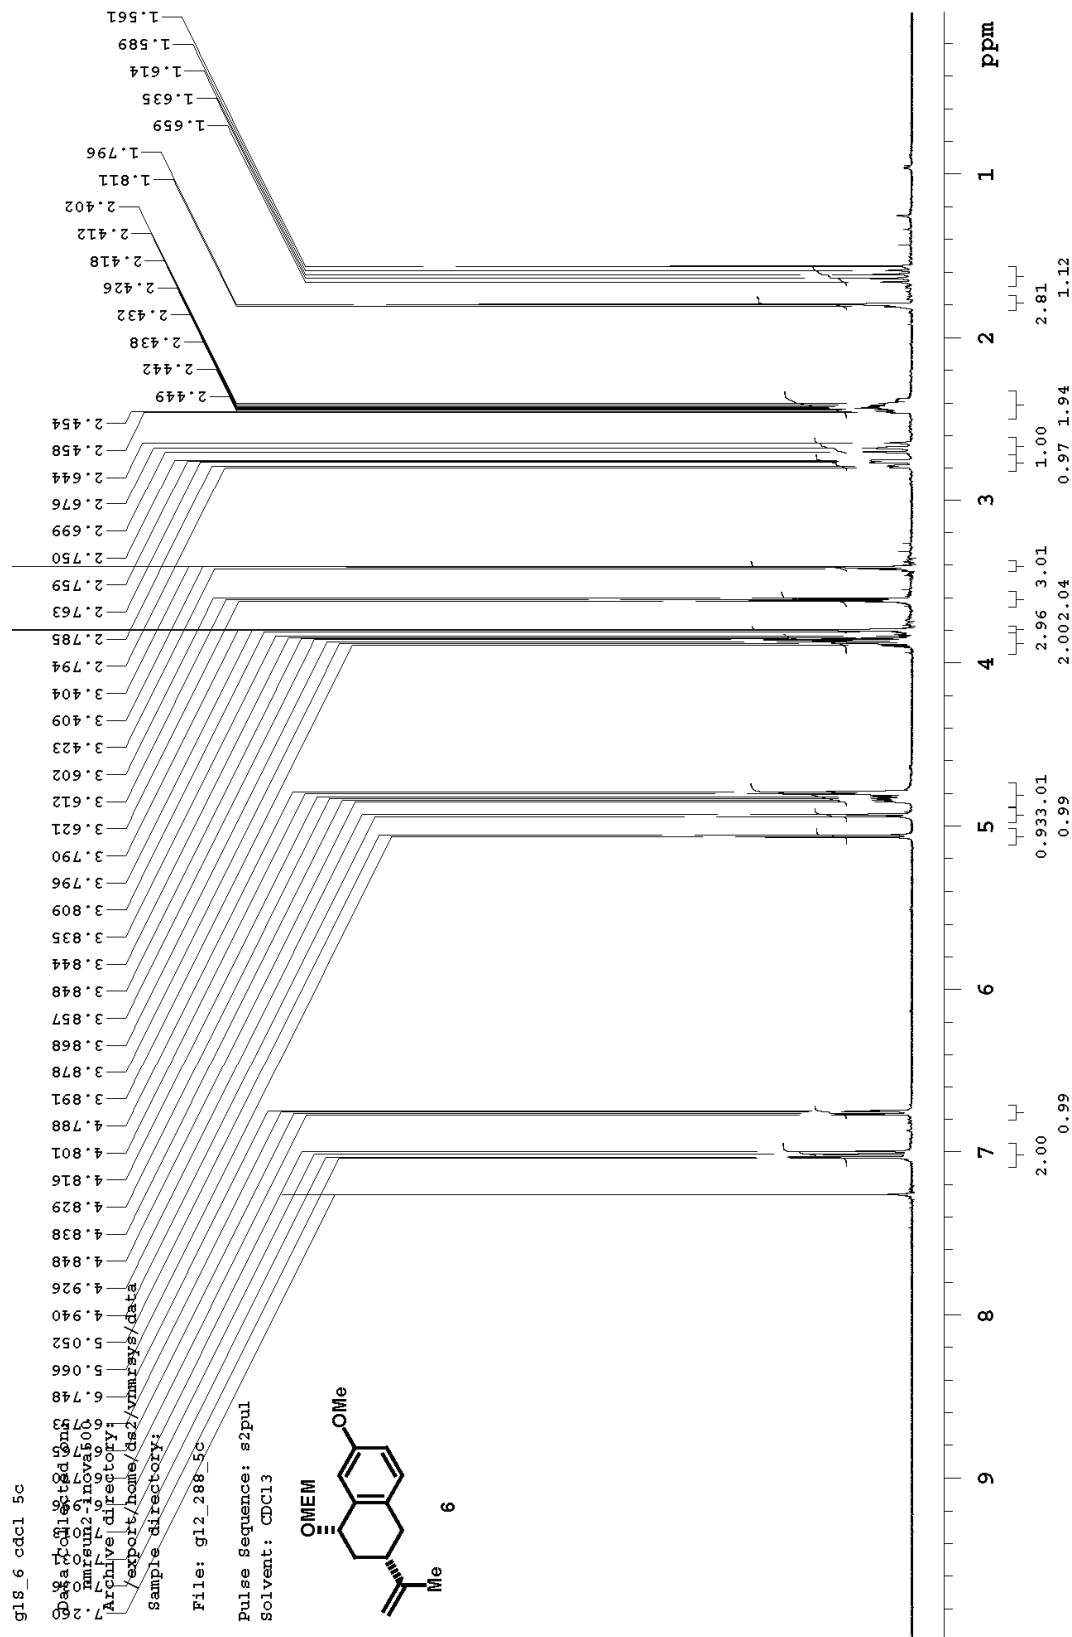

g15\_6 cdcl3 5c

Data Collected on:  
nmrsun2-inova500  
Archive directory:  
/export/home/ds2/vnmrSYS/data  
Sample directory:

File: cg11\_252\_5c

Pulse sequence: s2pul  
Solvent: CDCl3

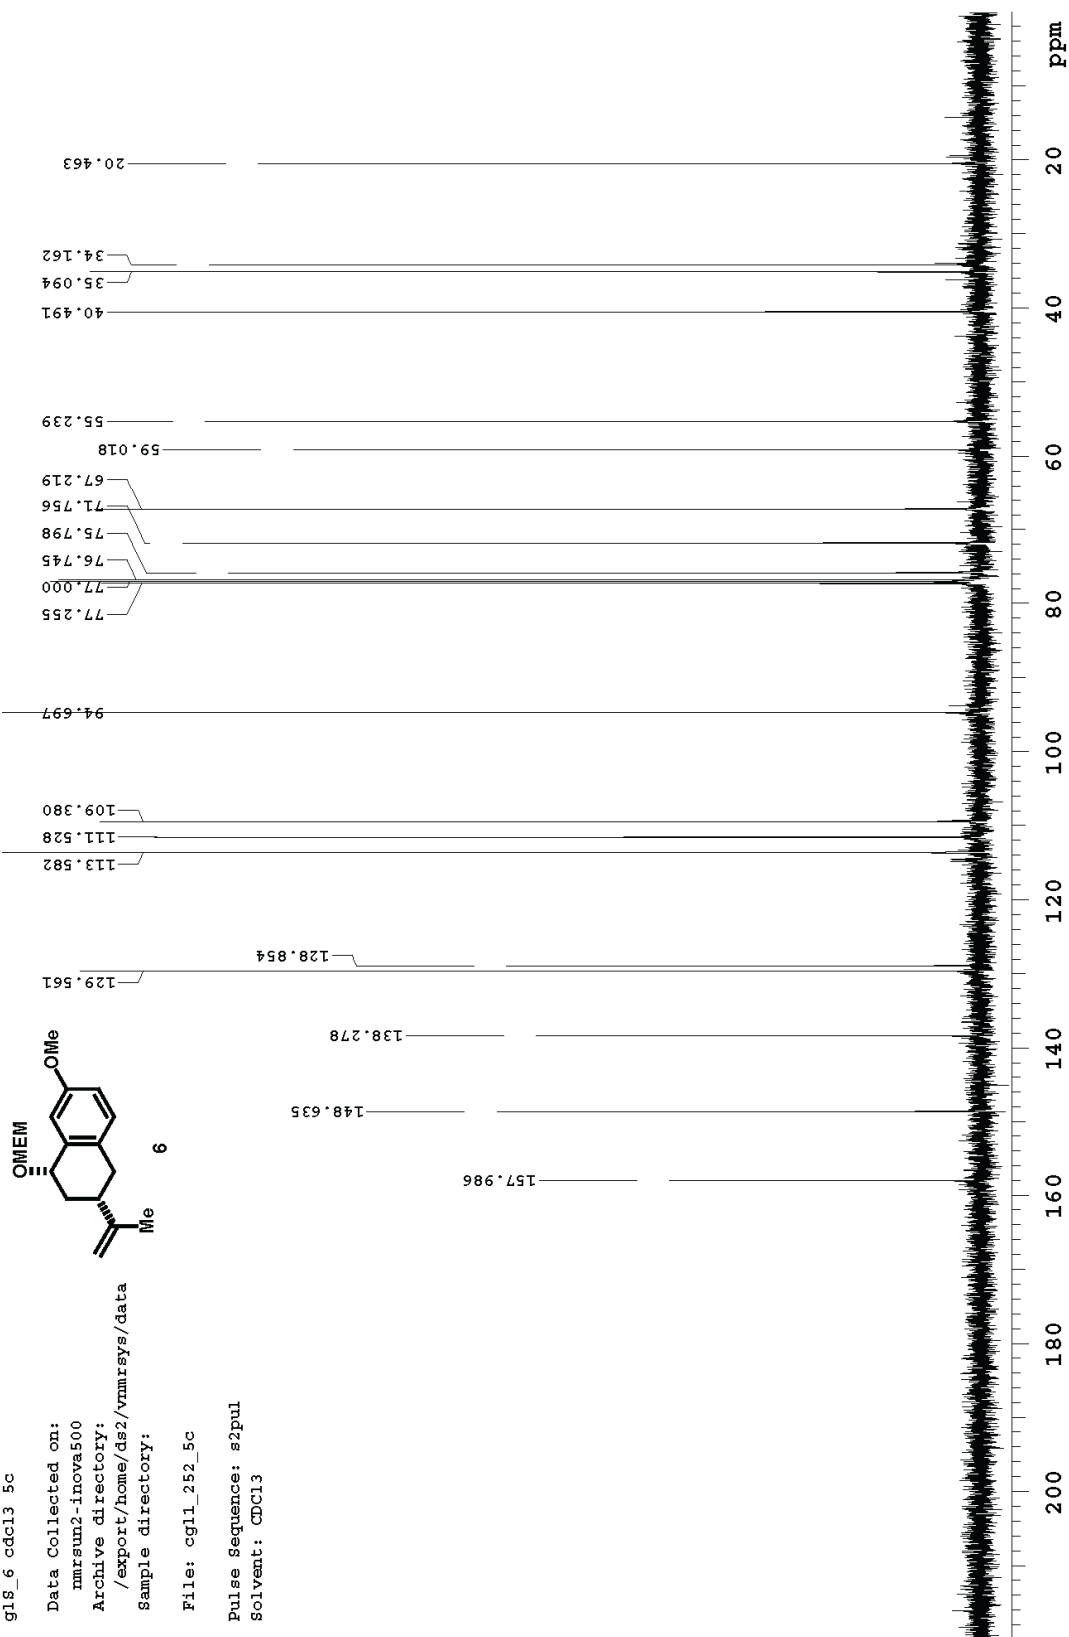



```

7.2.  C:\data\csl\etd\gms\
       nmreun2-inovator\
Archive directory:
       /export/home/ds2/nmrsys/data
Sample directory:
4.913
5.036
5.050
5.378
6.672

```

File: s7\_5b

Pulse Sequence: s2pul

Solvent: CDCl<sub>3</sub>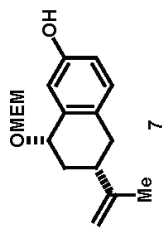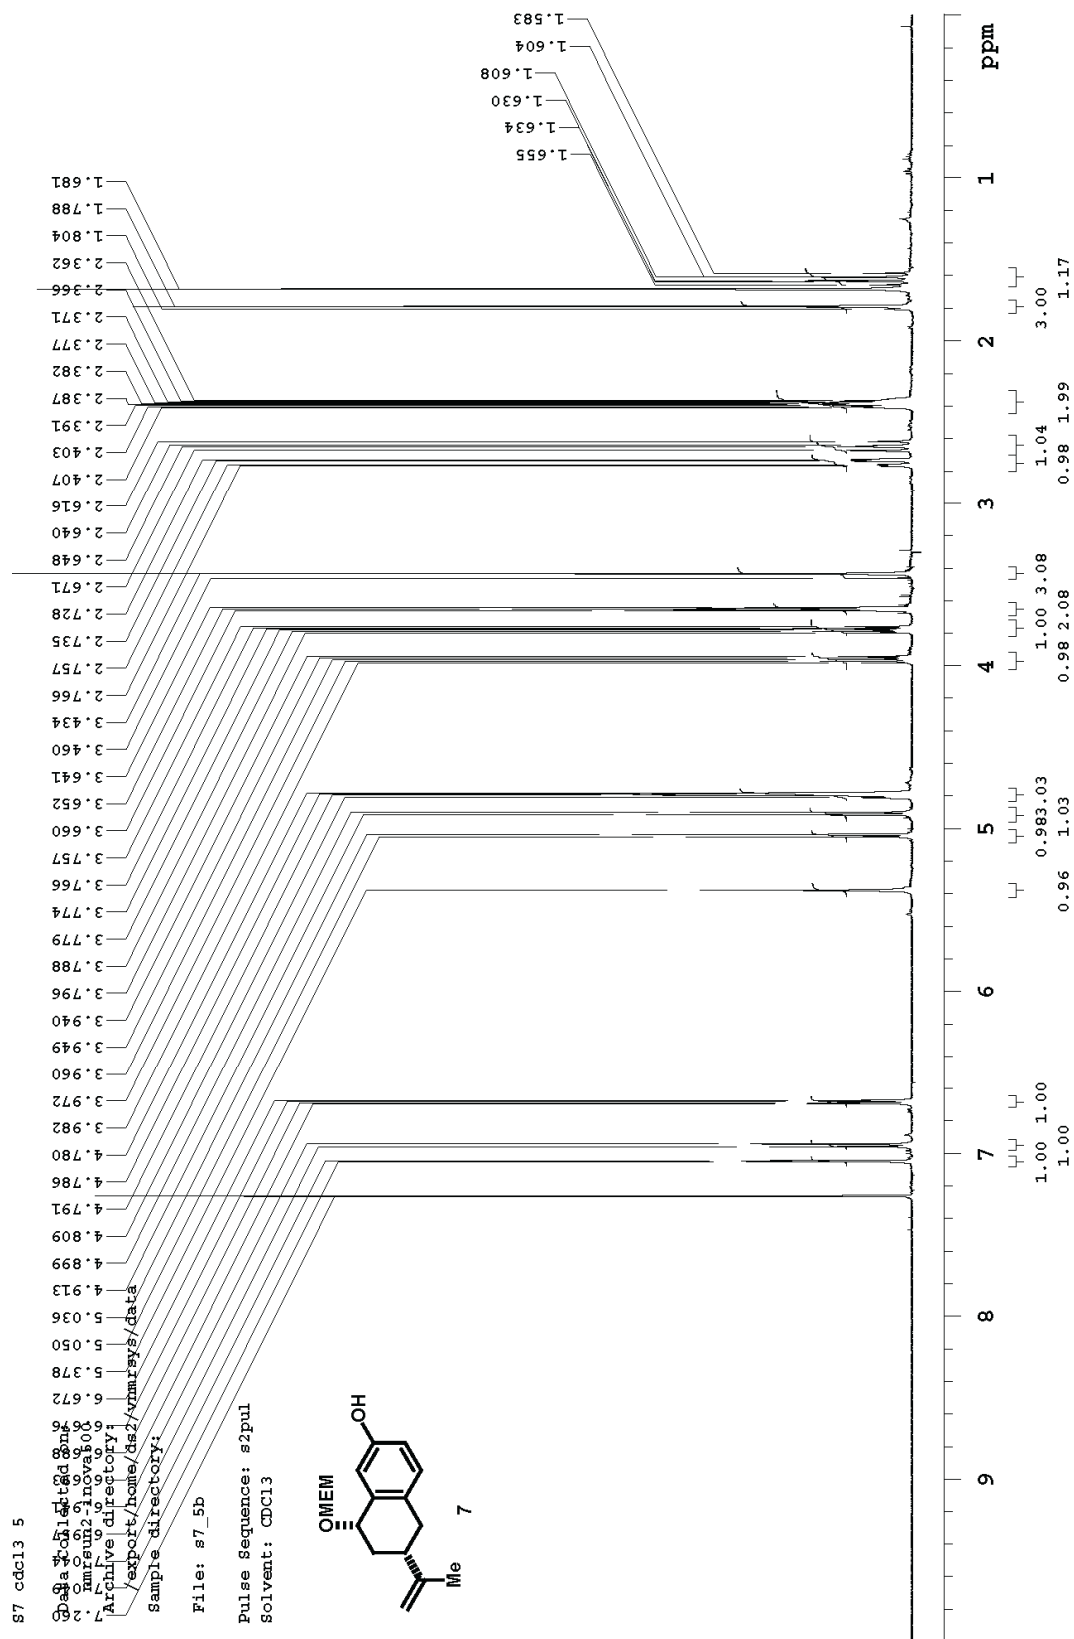

CS7 cdcl3 5b

Data Collected on:  
nmrsun2-inova500  
Archive directory:  
/export/home/ds2/vnmrsys/data  
Sample directory:

File: s7C\_5b

Pulse sequence: s2pul  
Solvent: CDCl3

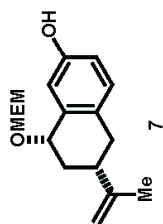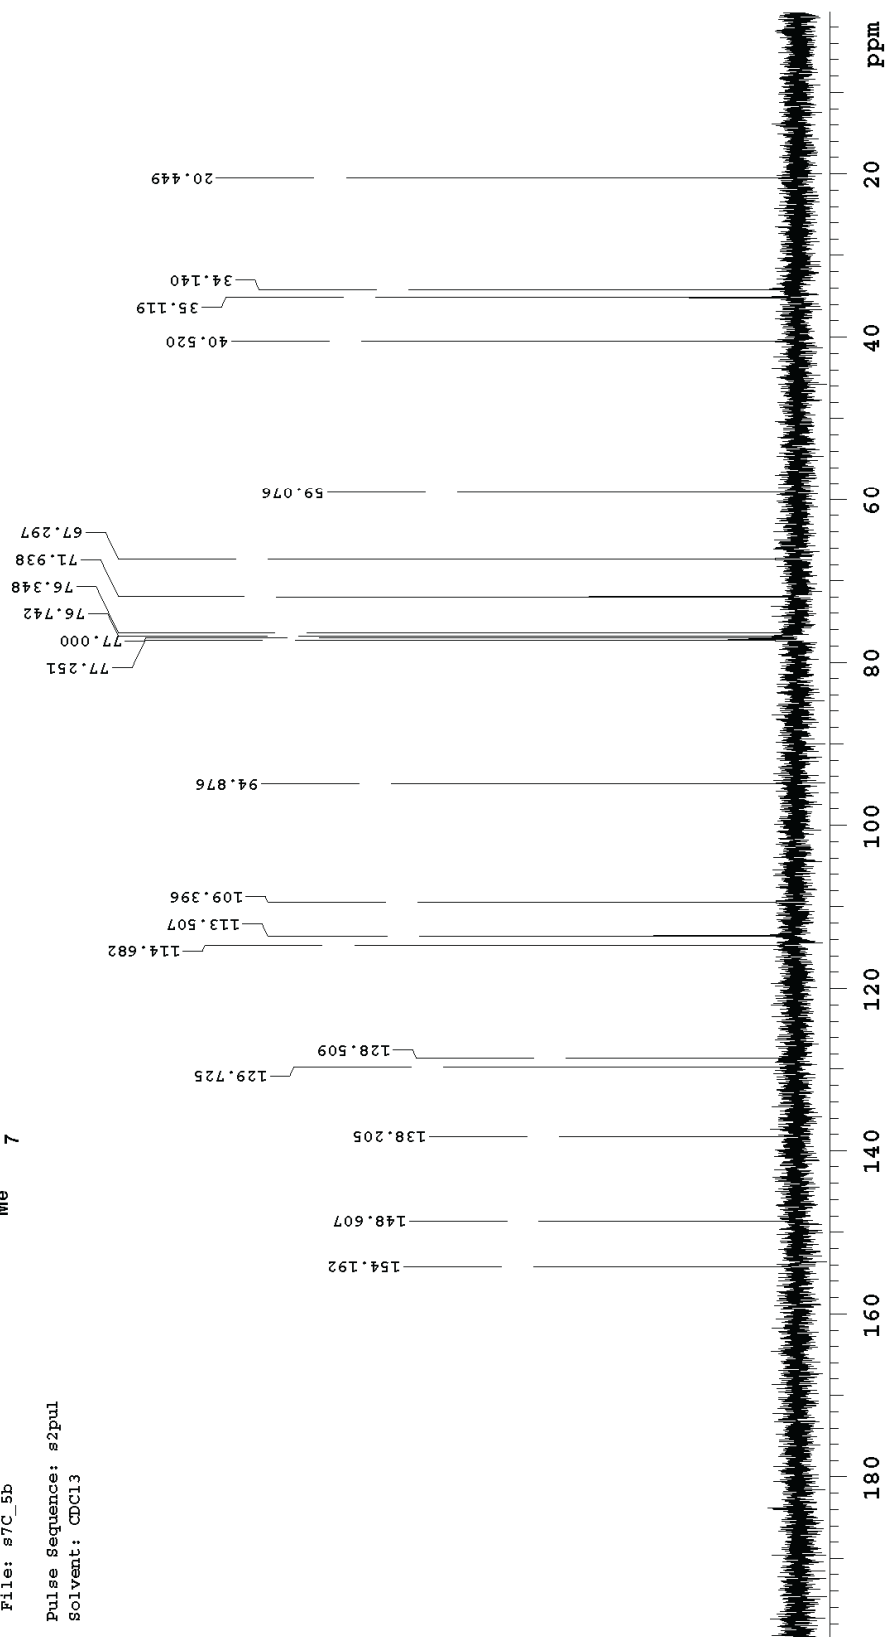

```

Data Collected On: 6/11/2006
nmrsun2-inova500: 6.777-6.778
Archive directory: 6.674-6.677
/export/home/ds2/vnmr/sys/data
Sample directory:

```

Pulse Sequence: s2pul  
Solvent: Benzene

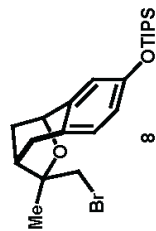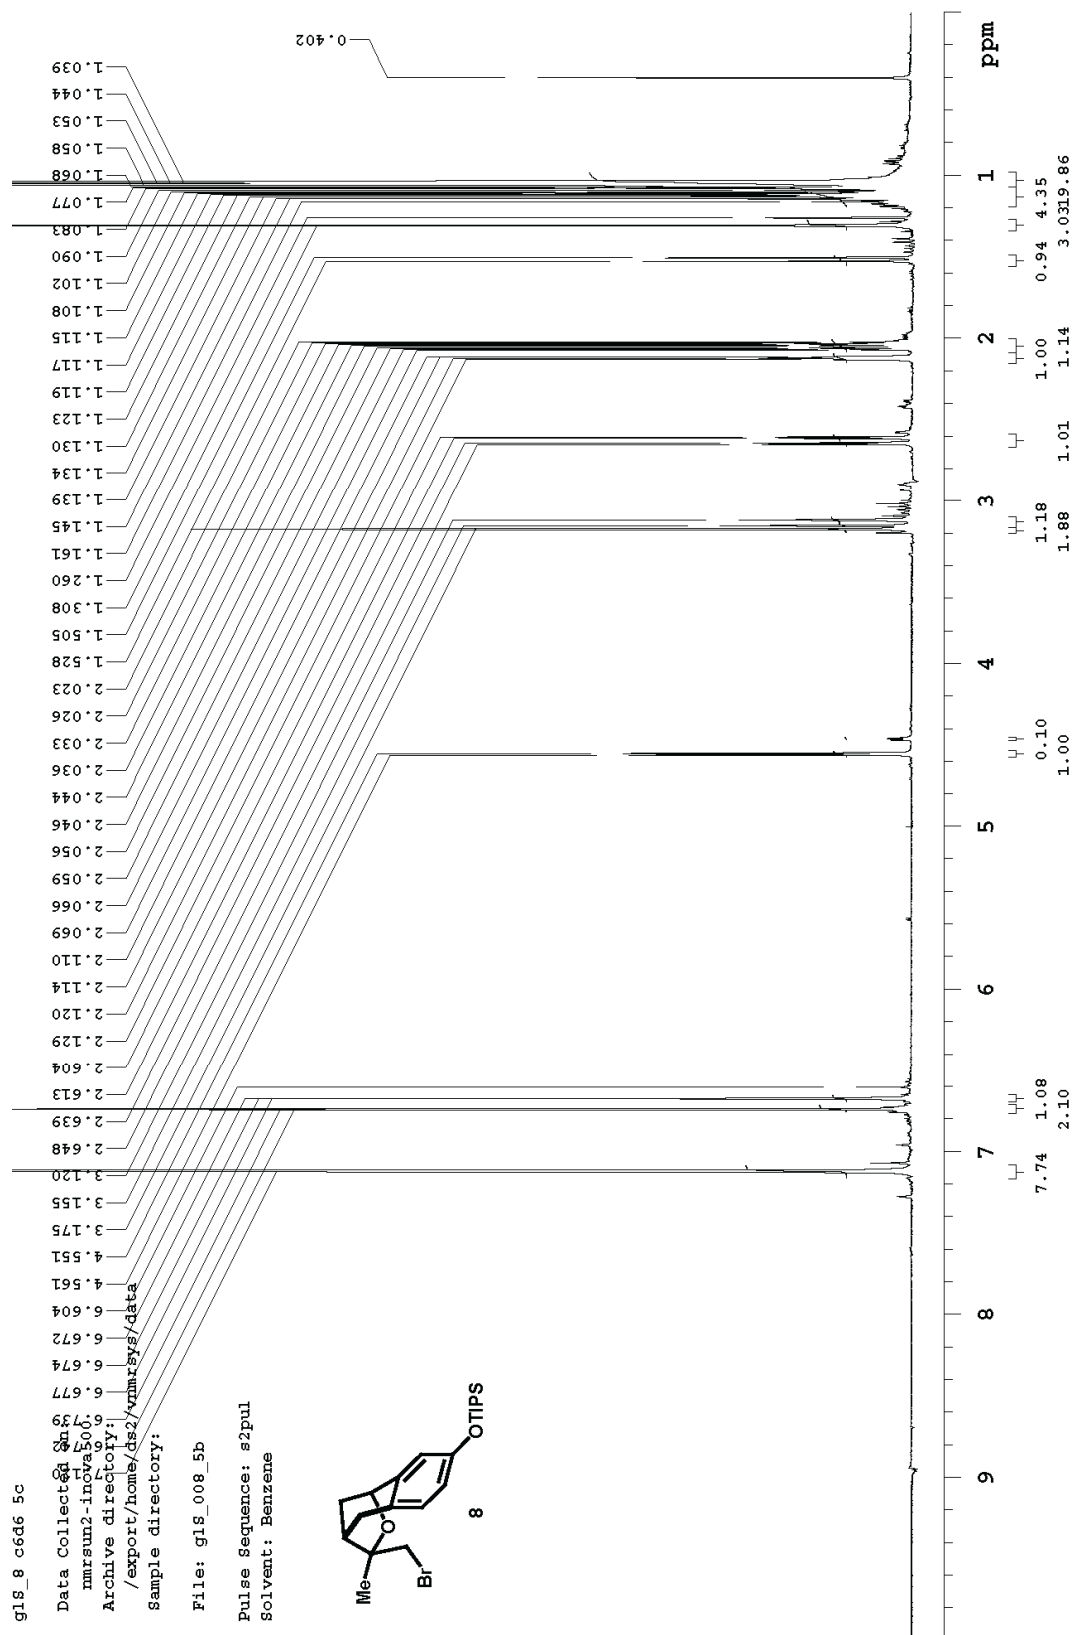

g1s\_8 c6d6 5b

Data Collected on:  
nmrsun2-inova500  
Archive directory:  
/export/home/ds2/vnmrsys/data  
Sample directory:

File: Cg1s\_008\_5b

Pulse sequence: s2pul  
Solvent: Benzene

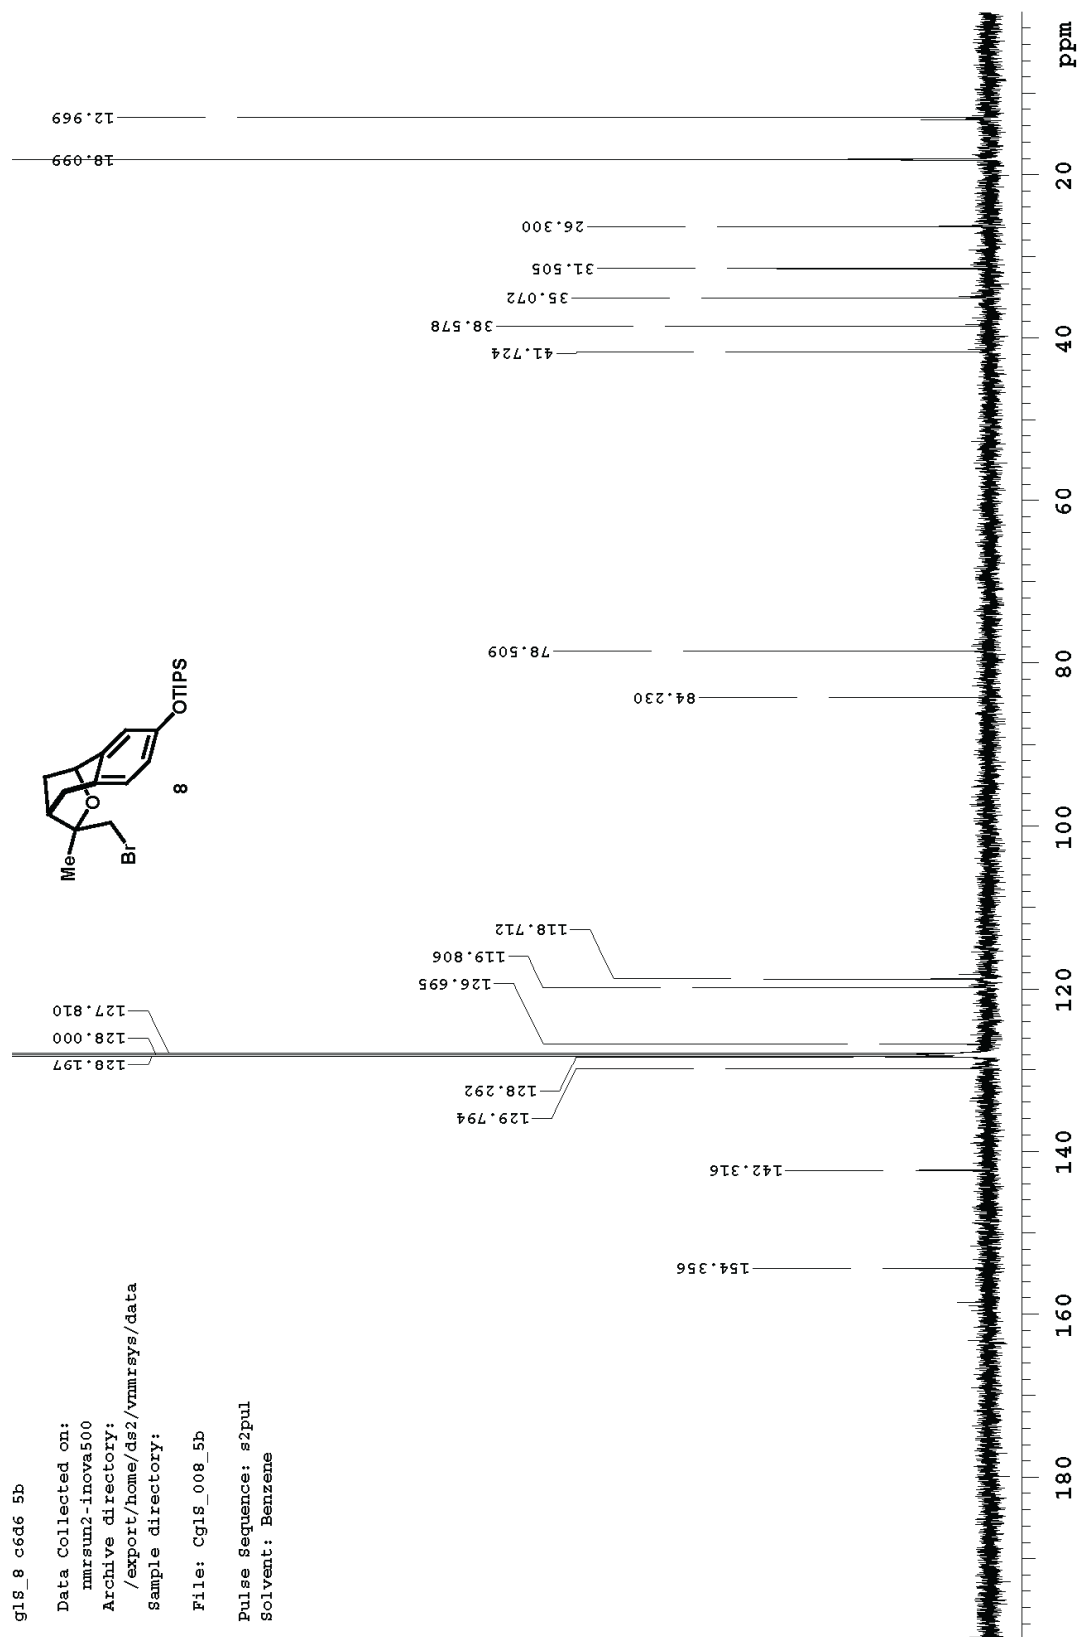

gis\_8\_1D NOE ccd6 6

Data Collected on:  
boris-inoxa600  
Archive directory:  
/export/home/is600/vnmrsys/data  
Sample directory:

File: s8\_1DNOE

Pulse Sequence: NOESY1D  
Solvent: Benzene

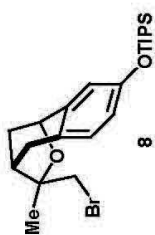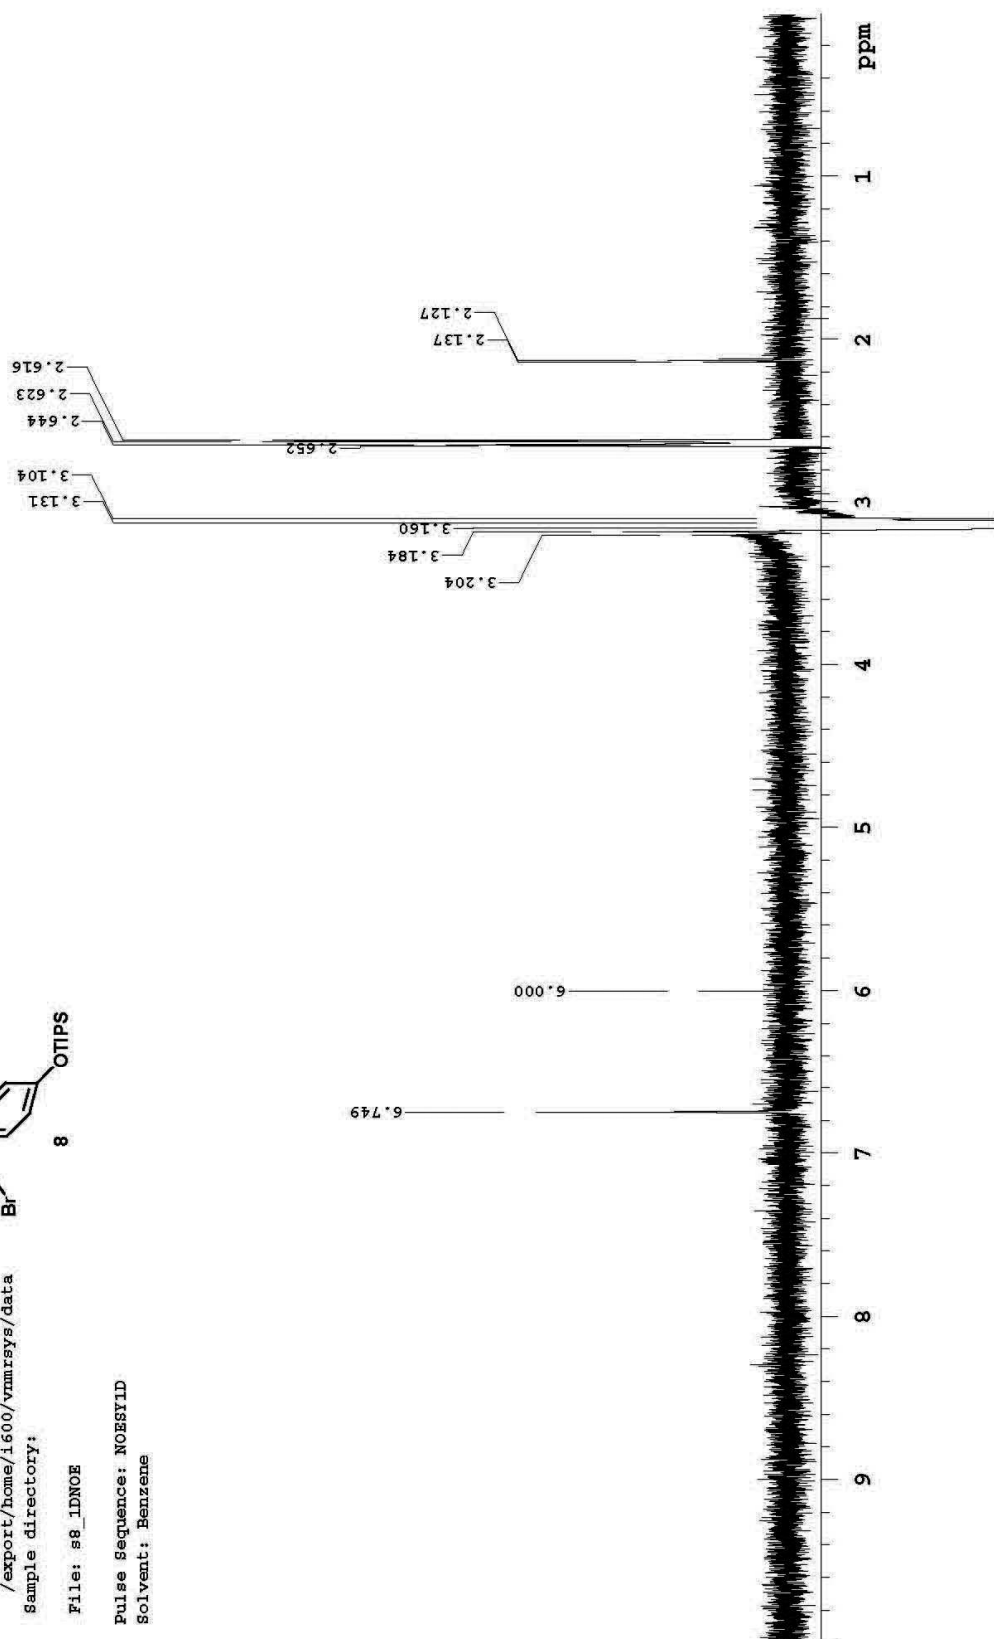

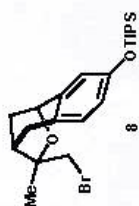

# STANDARD PROTON PARAMETERS

Pulse Sequence: NOESY

Solvent: Benzene

Temp.: 22.0 C / 295.1 K

INOVA-500 "Inova500b"

Relax. delay 1.000 sec

Mixing 0.500 sec

Acq. time 5603.8 sec

Width 3603.8 Hz

20 Width 3603.8 Hz

8 repetitions

2 x 200 increments

OBSERVE M1, 500.1739780 MHz

DATA PROCESSING

Gauss apodization 0.066 sec

FOUR PROCESSING

Gauss apodization 0.051 sec

FT size 2048 x 2048

Total time 1 hr, 30 min, 39 sec

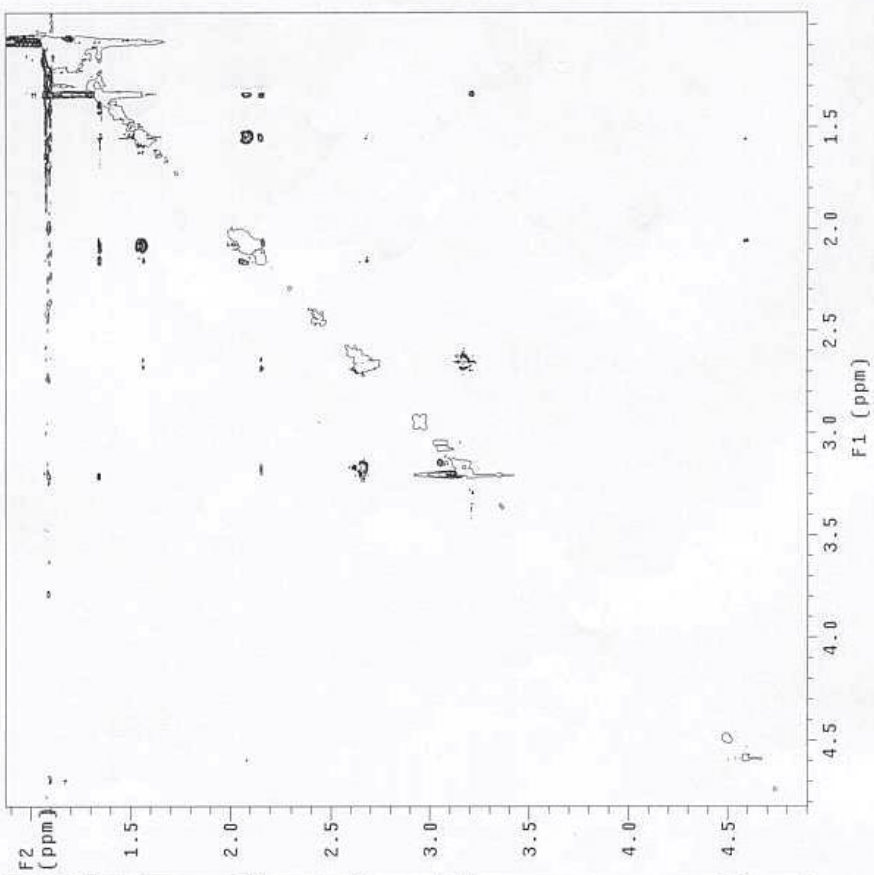

# STANDARD PROTON PARAMETERS

Pulse Sequence: ghsqc  
 Solvent: benzene  
 Temp: 300.2 K  
 User: 1-14-87 / 295.1 K  
 INOVA-500 "Inova500b"  
 Relax. delay 1.000 sec  
 Acq. time 0.136 sec  
 Width 3751.6 Hz  
 2D Width 21378.9 Hz  
 4 Repetitions  
 8 Increments  
 OBSERVE F1 125.773928 MHz  
 DECOUPLE C13 125.778252 MHz  
 Power 45 dB  
 on during acquisition  
 off during delay  
 GARP-1 modulated  
 DATA PROCESSING  
 F1 Data Processing on 0.063 sec  
 F1 Data Processing  
 Gauss apodization 0.011 sec  
 FT size 1024 x 2048  
 Total time 21 min, 15 sec

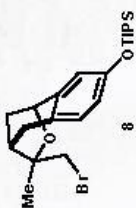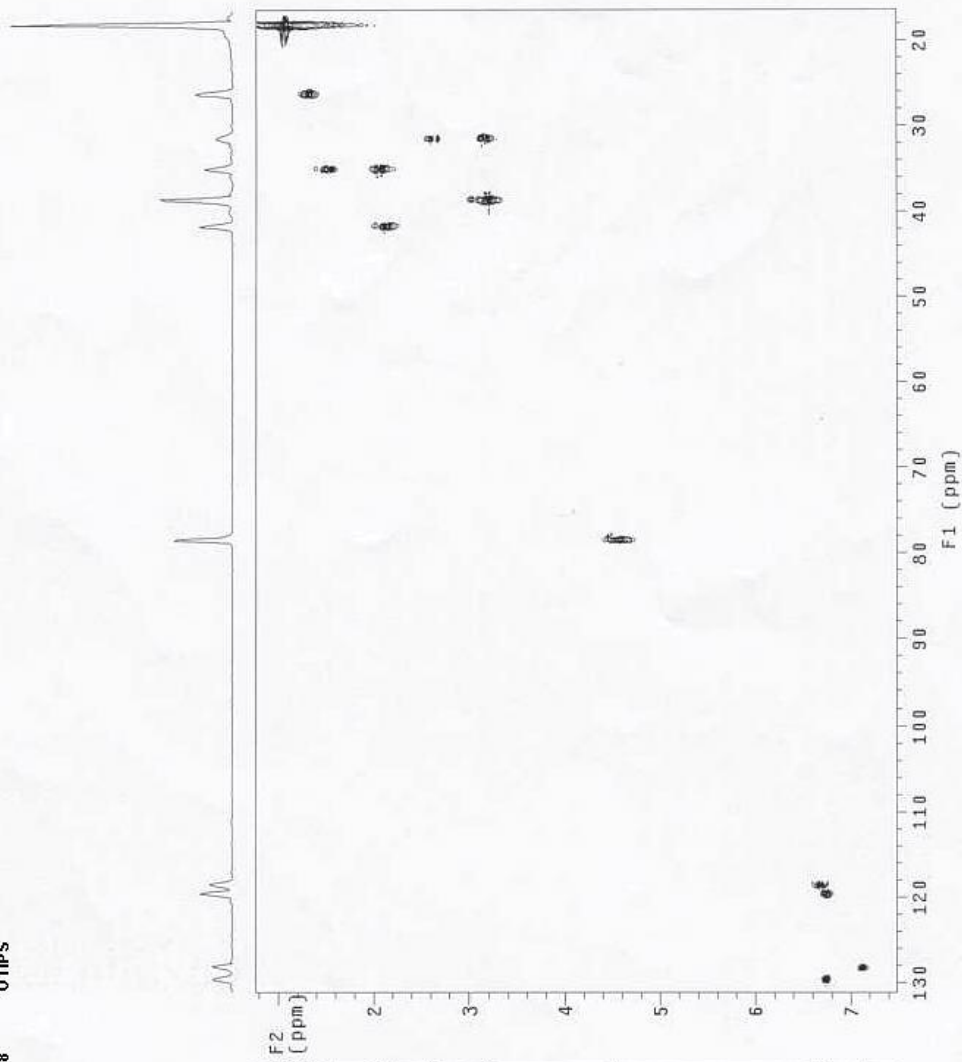

glS\_9 cdcl3 5b

Data Collected on:  
nmrsun2-inova500  
Archive directory:  
/export/home/ds2/vnmrSYS/data  
Sample directory:

File: glS\_009\_5b

Pulse sequence: s2pul  
Solvent: CDCl3

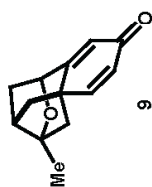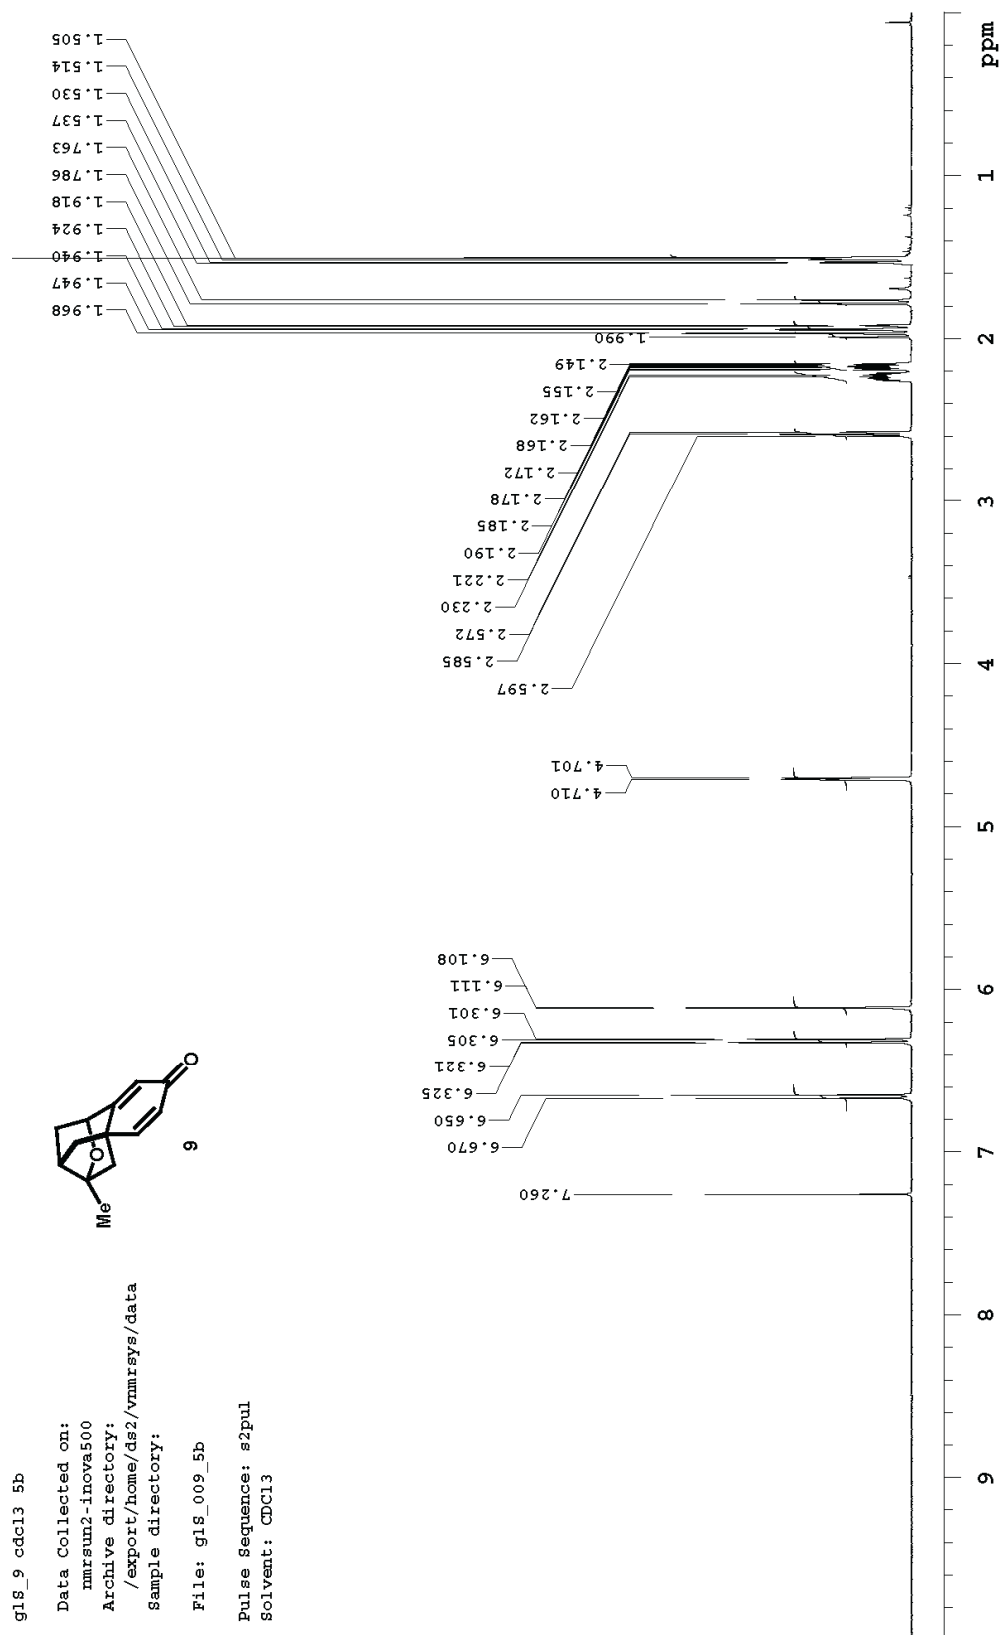



gls\_9 cdcl3 5b

Data Collected on:  
nmrsun2-inova500  
Archive directory:  
/export/home/ds2/vnmrsys/data  
Sample directory:

File: gls\_009\_5b

Pulse sequence: s2pul  
Solvent: CDCl3

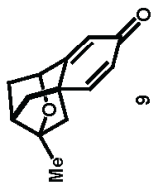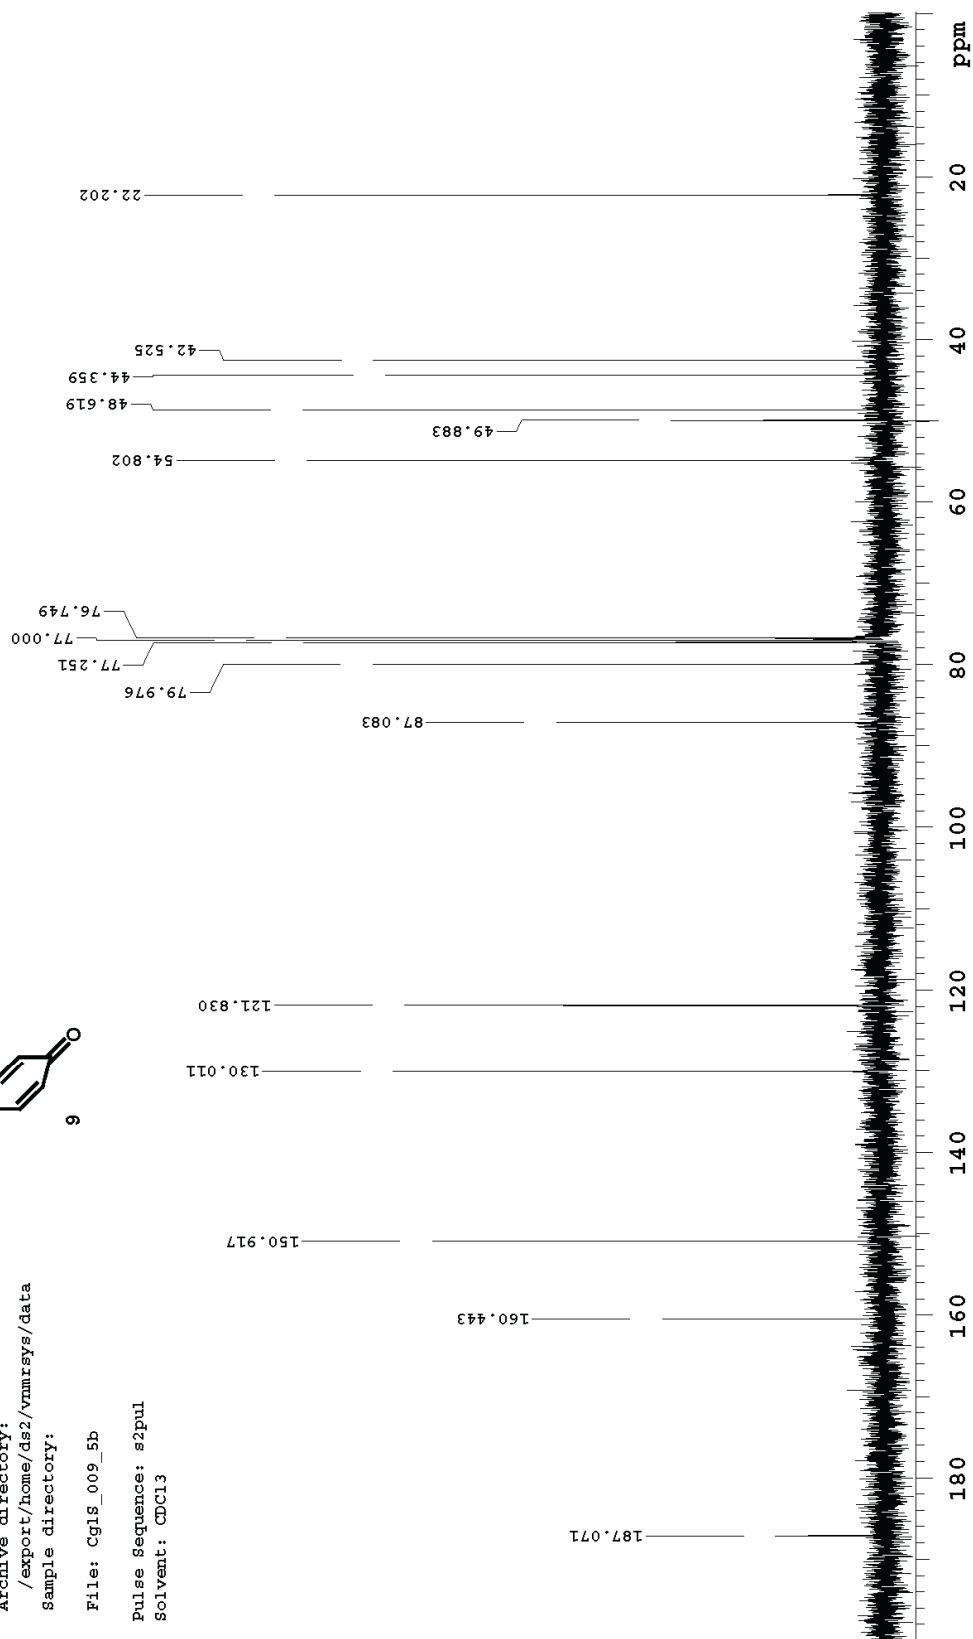

gls\_10 cdcl3 5b

Data Collected on:  
nmrsun2-inova500  
Archive directory:  
/export/home/ds2/vnmrsys/data  
Sample directory:

File: gls\_010\_5b

Pulse sequence: s2pul  
Solvent: CDCl3

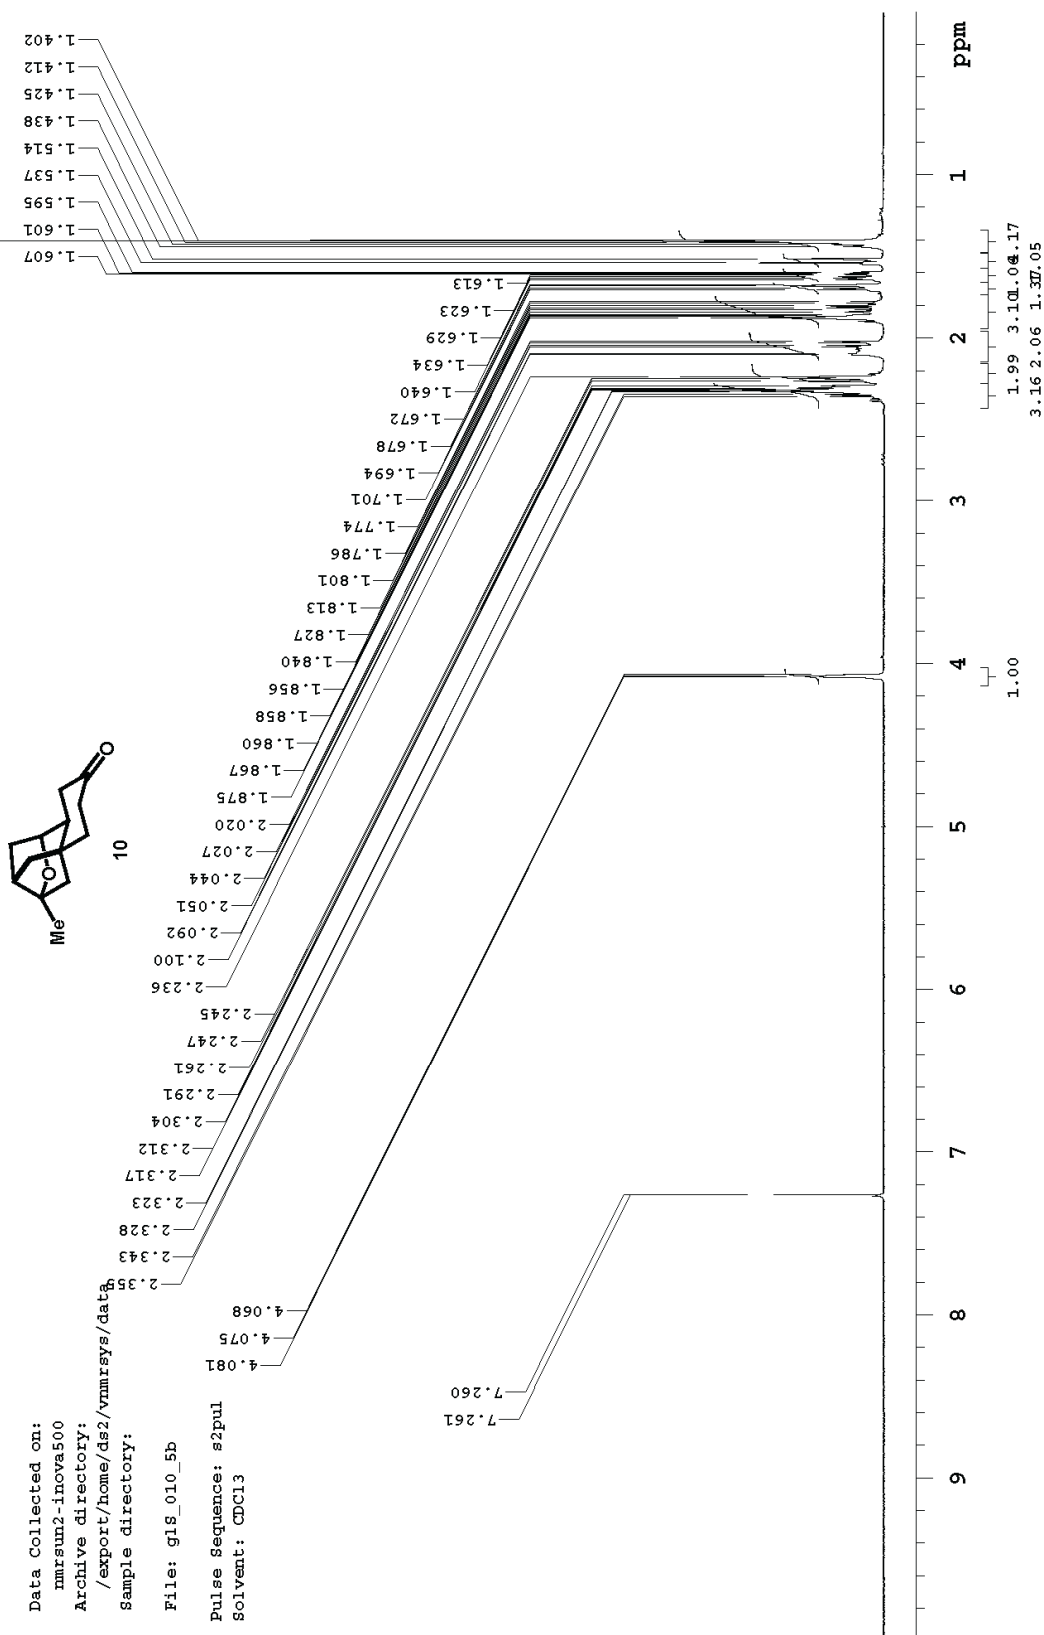

cg1s\_10 cdcl3 5b

Data Collected on:  
nmrsun2-inova500  
Archive directory:  
/export/home/ds2/vnmrsys/data  
Sample directory:

File: Cg1s\_010\_5b

Pulse sequence: s2pul  
Solvent: CDCl3

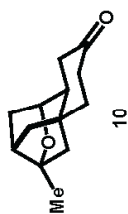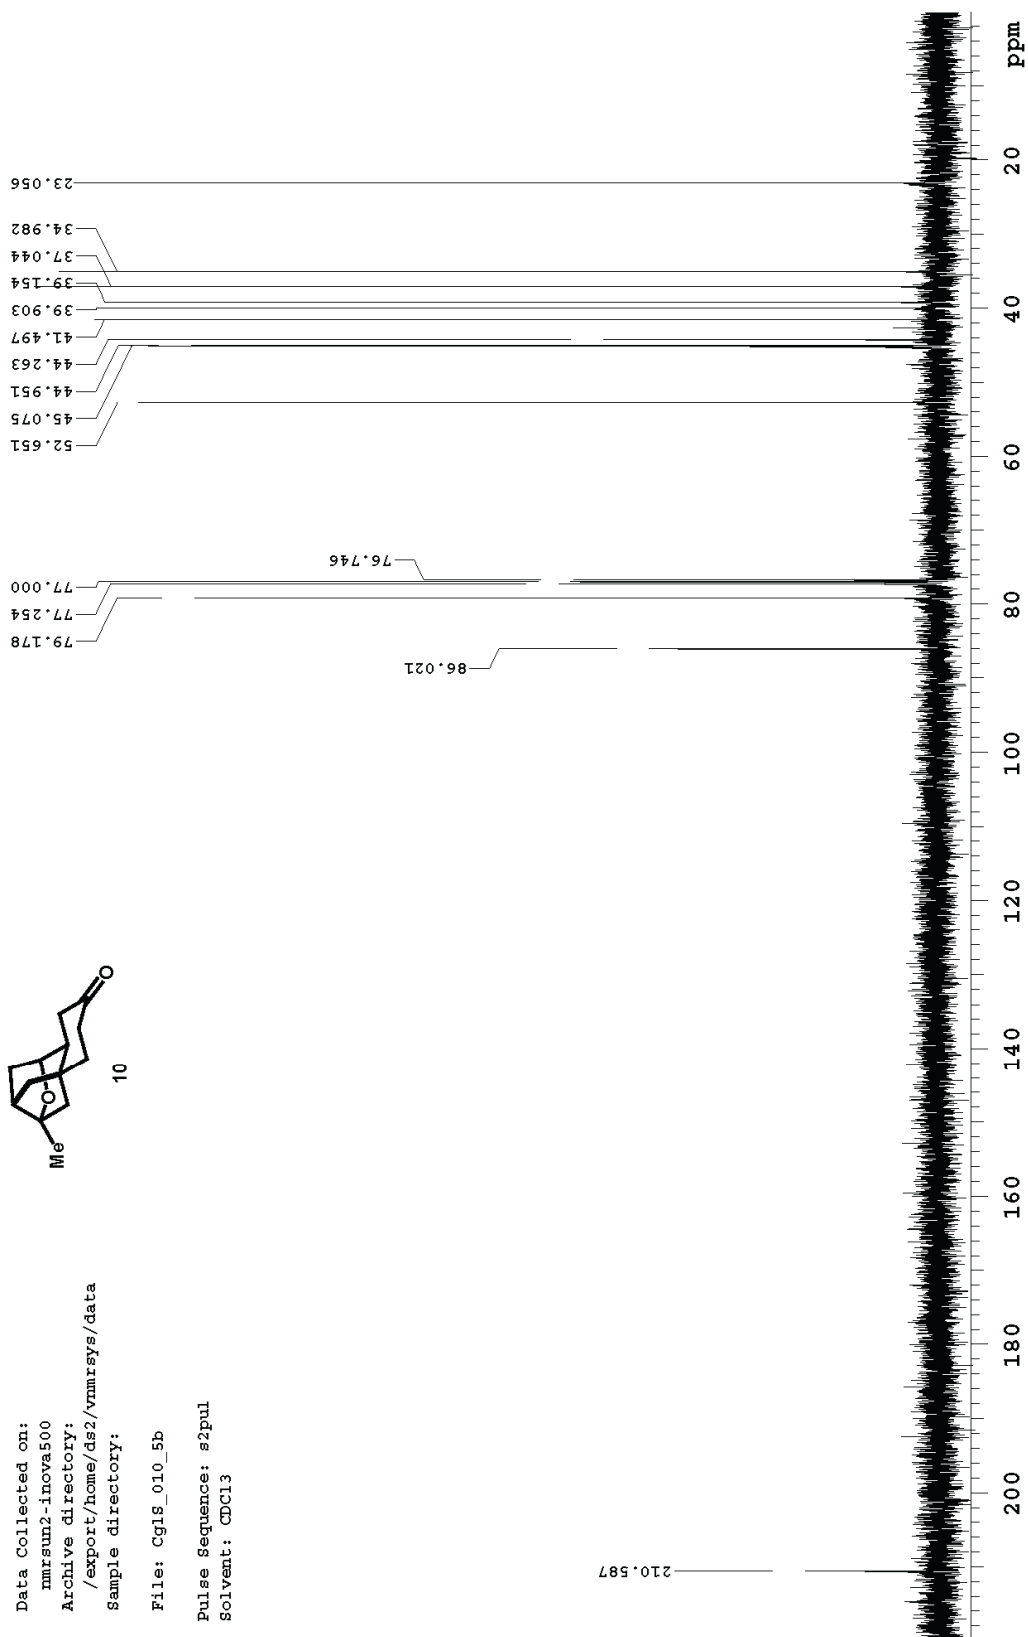

glS\_11 cdcl3 5b

Data Collected on:  
nmrsun2-inova500  
Archive directory:  
/export/home/ds2/vnmrSYS/data  
Sample directory:

File: gl2S\_011\_5b

Pulse sequence: s2pul  
Solvent: CDCl3

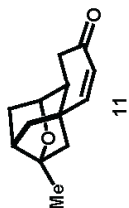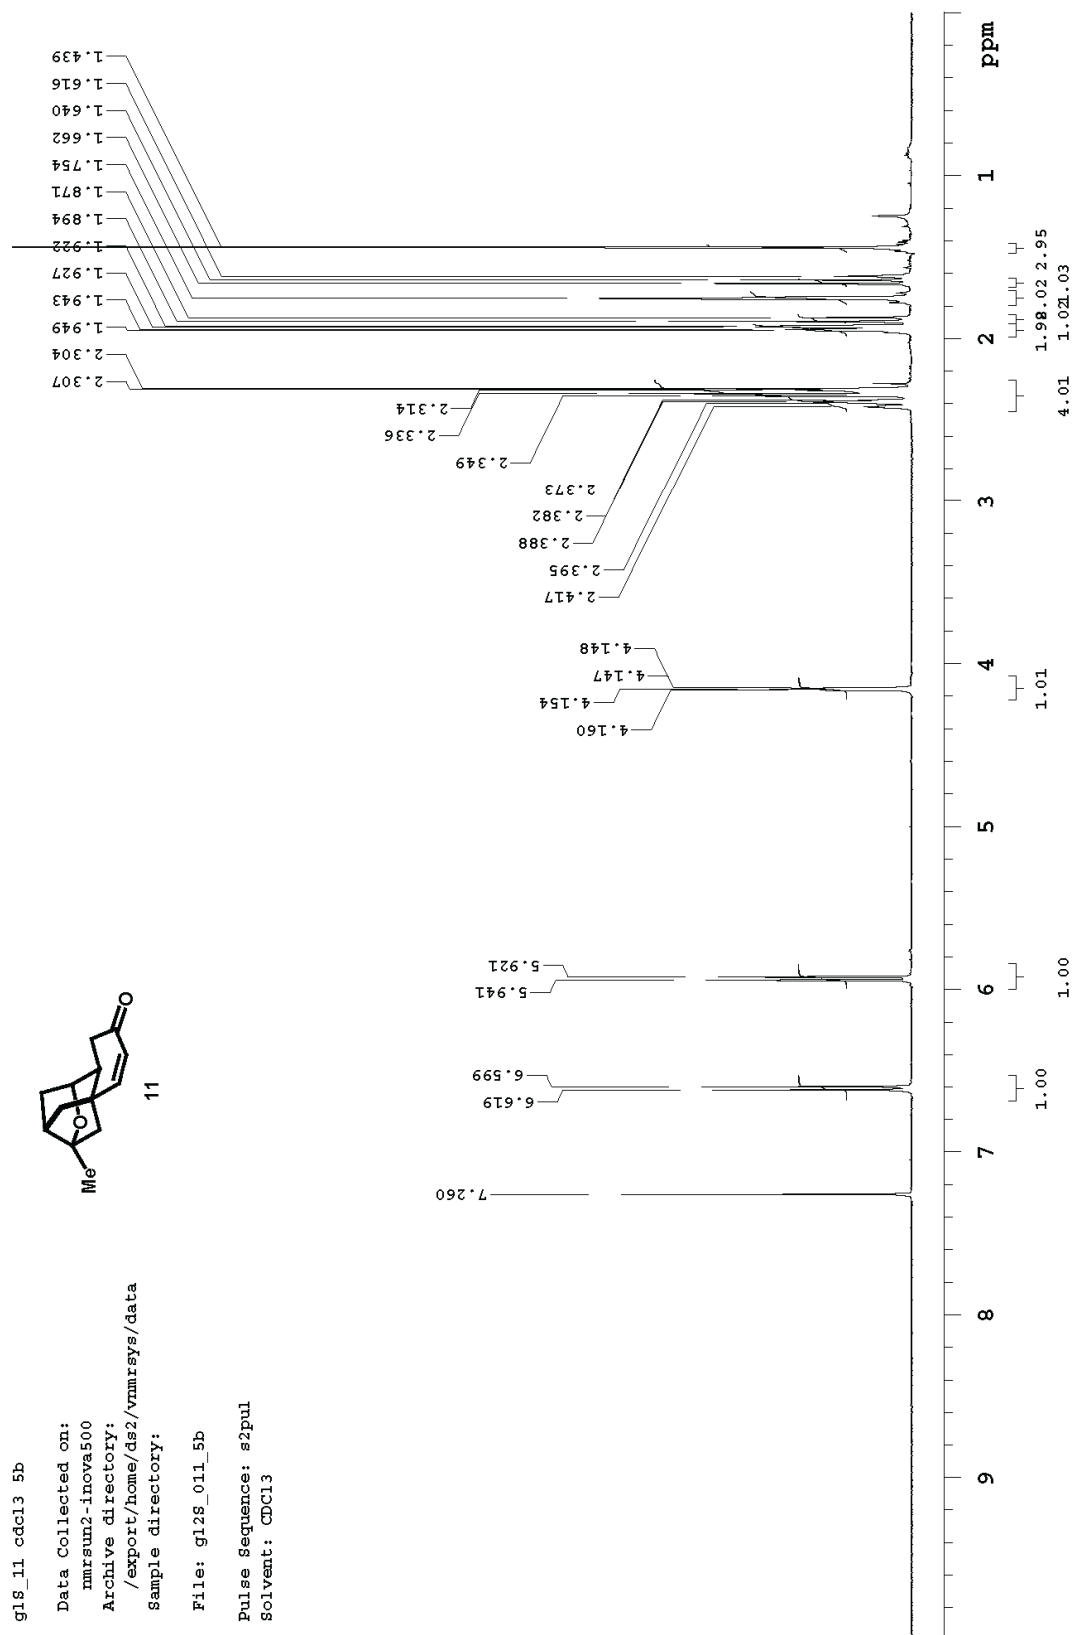

g1s\_11 cdcl3 5c

Data Collected on:  
nmrsun2-inova500  
Archive directory:  
/export/home/ds2/vnmrsys/data  
Sample directory:

File: Cg12\_285\_5c

Pulse sequence: s2pul  
Solvent: CDCl3

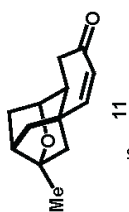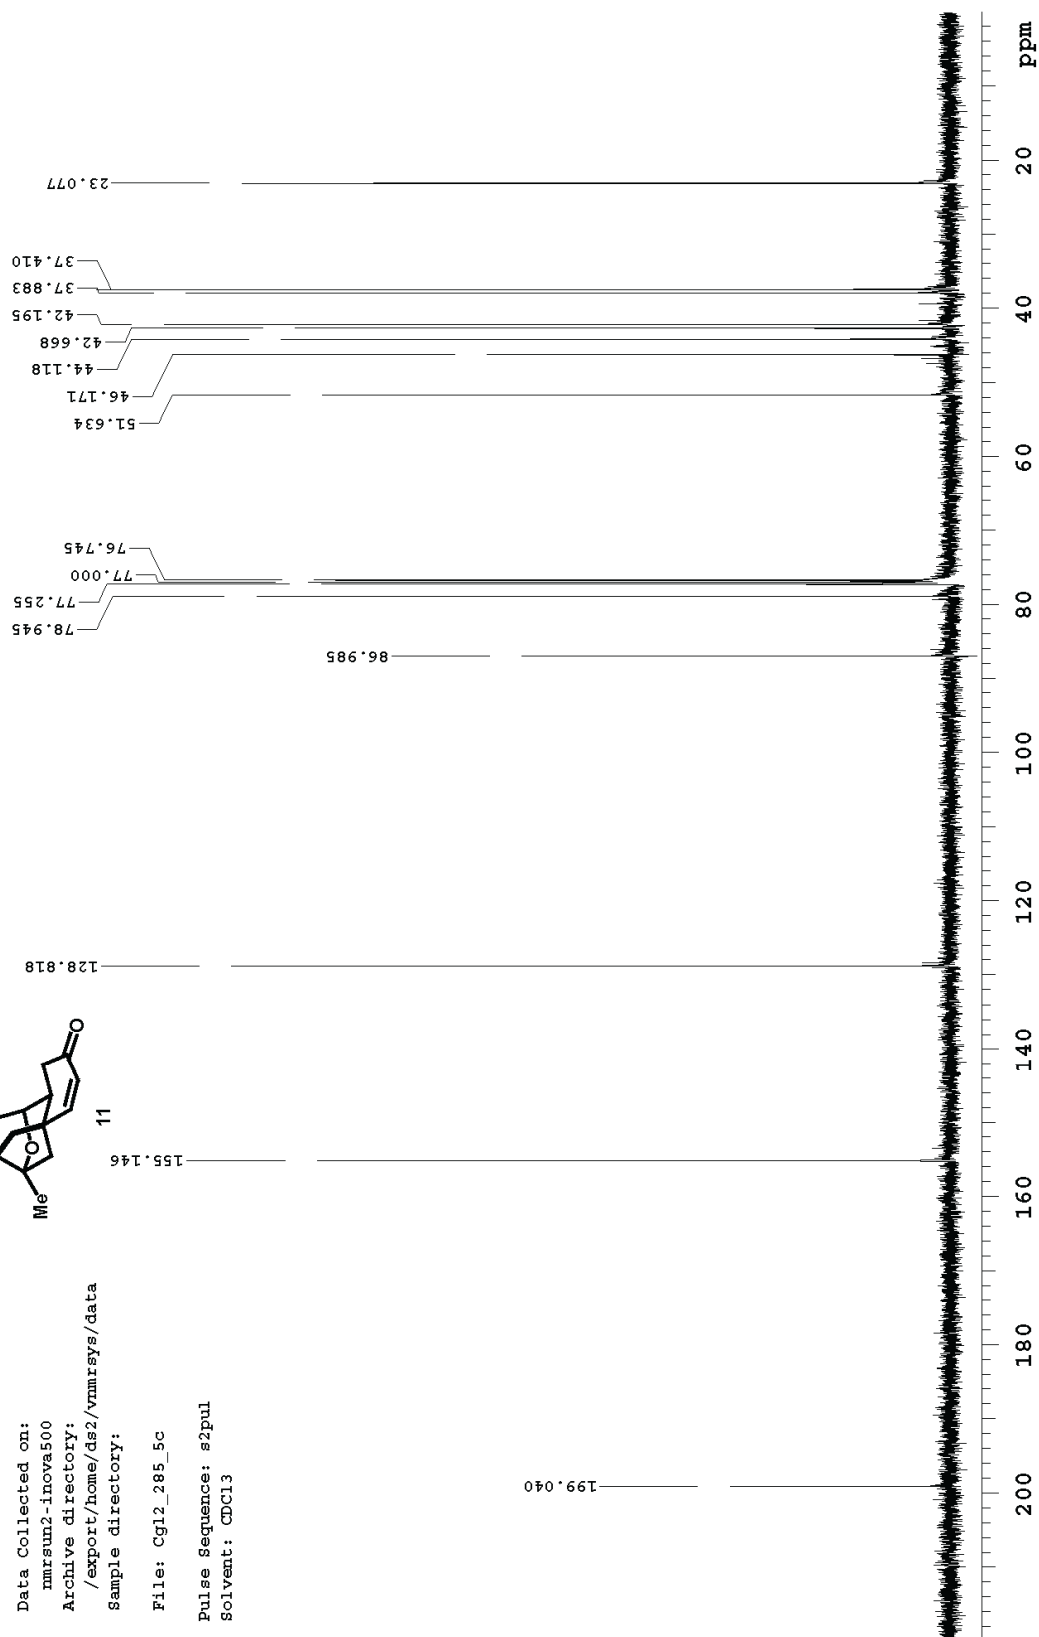

=====

|                 |                                        |           |          |
|-----------------|----------------------------------------|-----------|----------|
| Injection Date  | : 8/2/2007 3:40:47 PM                  | Seq. Line | : 1      |
| Sample Name     | : 2285_                                | Location  | : Vial 1 |
| Acq. Operator   | : Gl                                   | Inj       | : 1      |
| Acq. Instrument | : Instrument 1                         |           |          |
| Acq. Method     | : C:\HPCHEM\1\METHODS\LALIC\FINALINT.M |           |          |
| Last changed    | : 8/2/2007 2:58:46 PM by Gl            |           |          |
| Analysis Method | : C:\HPCHEM\1\METHODS\LALIC\FINALINT.M |           |          |
| Last changed    | : 8/2/2007 4:15:16 PM by Gl            |           |          |
|                 | (modified after loading)               |           |          |

2 IPA in hex

2% iPrOH in hexane AD-H

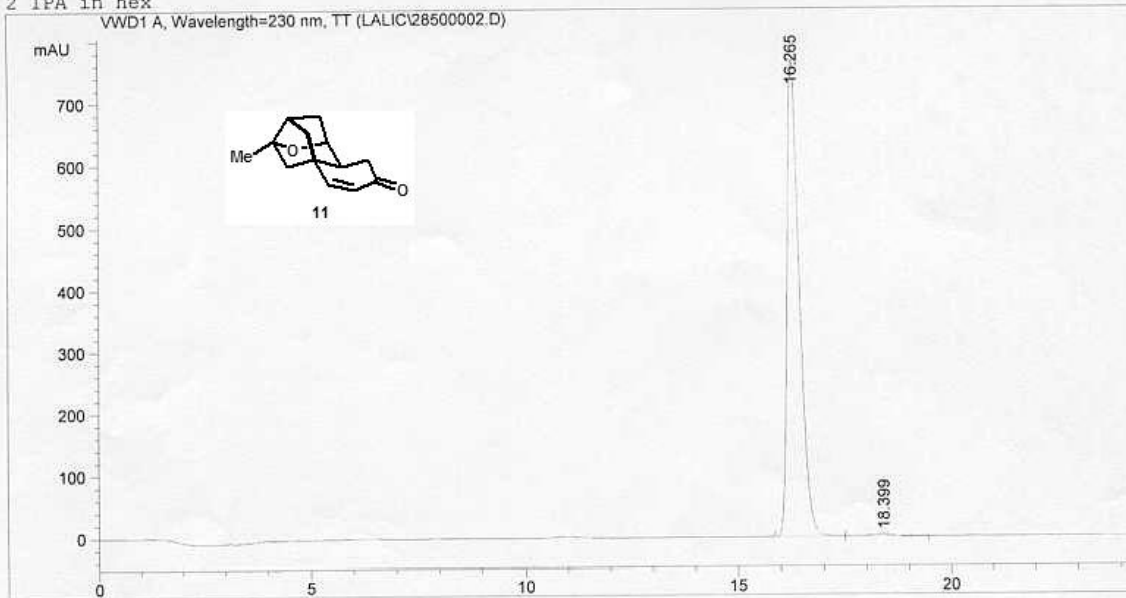

=====

Area Percent Report

=====

Sorted By : Signal  
Multiplier : 1.0000  
Dilution : 1.0000  
Use Multiplier & Dilution Factor with ISTDs

Signal 1: VWD1 A, Wavelength=230 nm, TT

| Peak # | RetTime [min] | Type | Width [min] | Area mAU *s | Height [mAU] | Area %  |
|--------|---------------|------|-------------|-------------|--------------|---------|
| 1      | 16.265        | BB   | 0.3013      | 1.52692e4   | 769.94861    | 99.1367 |
| 2      | 18.399        | BB   | 0.5009      | 132.96970   | 3.63604      | 0.8633  |

Totals : 1.54022e4 773.58465

Results obtained with enhanced integrator!

=====

\*\*\* End of Report \*\*\*

cg1s\_s1 cdcl3 5c

Data Collected on:  
nmrsun2-inova500  
Archive directory:  
/export/home/ds2/vnmrsys/data  
Sample directory:

File: cg11\_237\_5c

Pulse sequence: s2pul  
Solvent: CDCl3

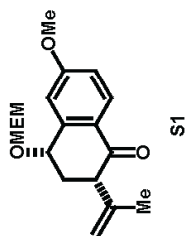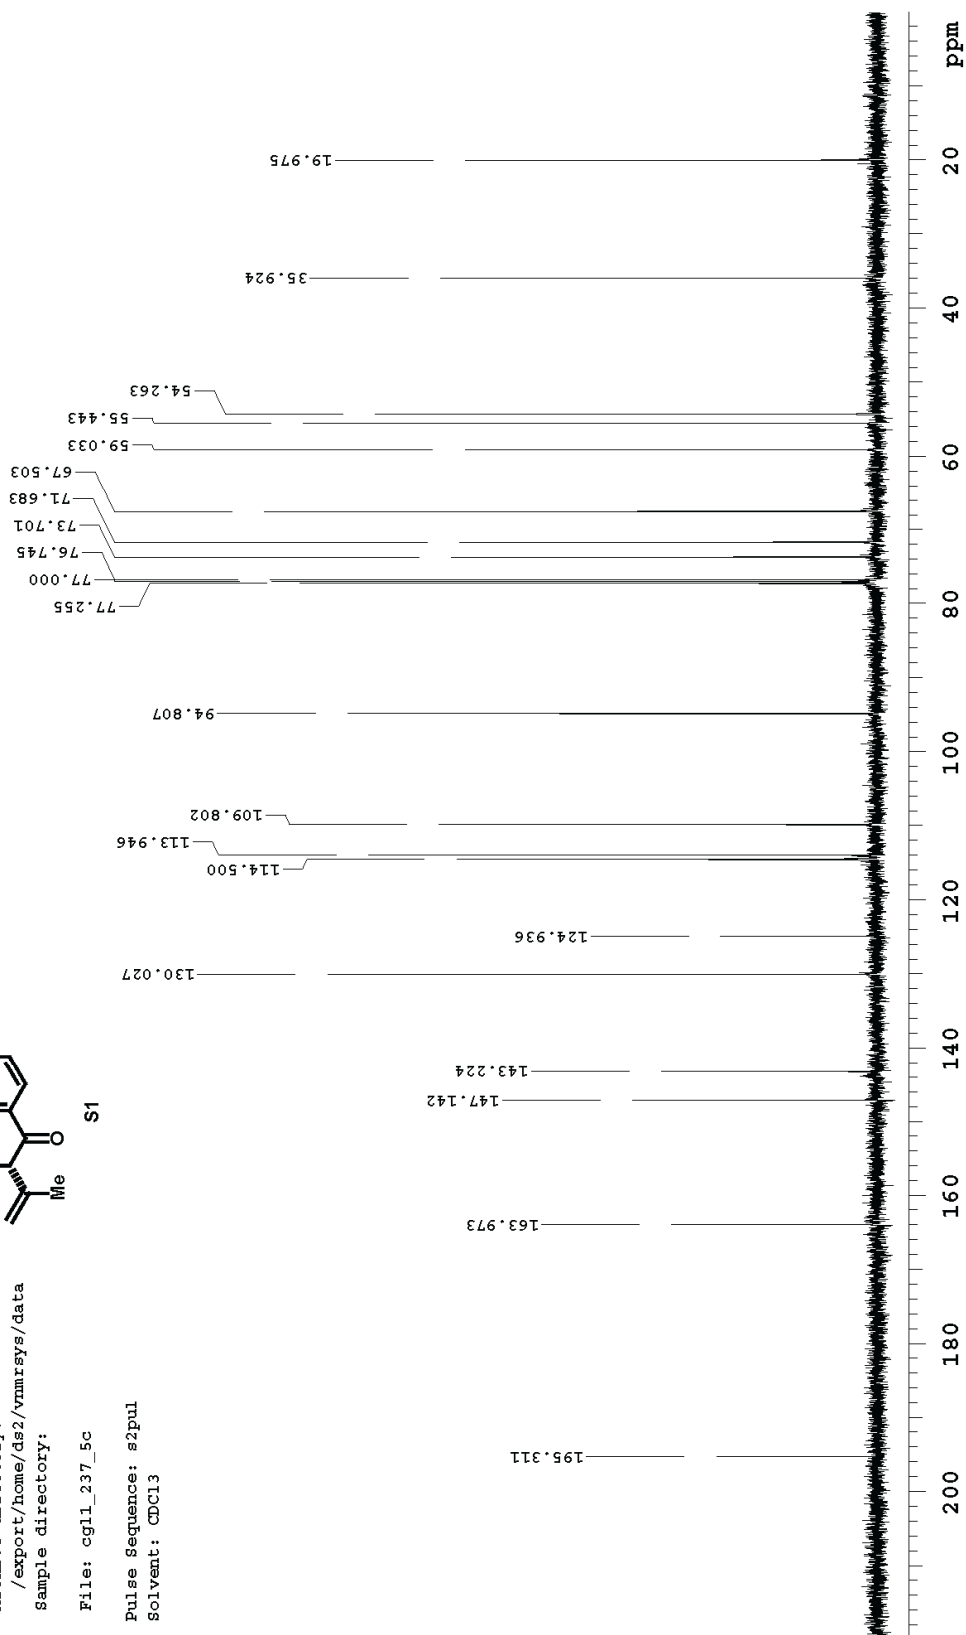

g11\_237 cdcl3 5c

Data Collected on:  
nmrsun2-inova500  
Archive directory:  
/export/home/ds2/vnmrsys/data  
Sample directory:

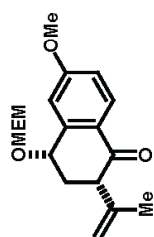

File: g11\_237\_5c

Pulse sequence: s2pul

Solvent: CDCl3

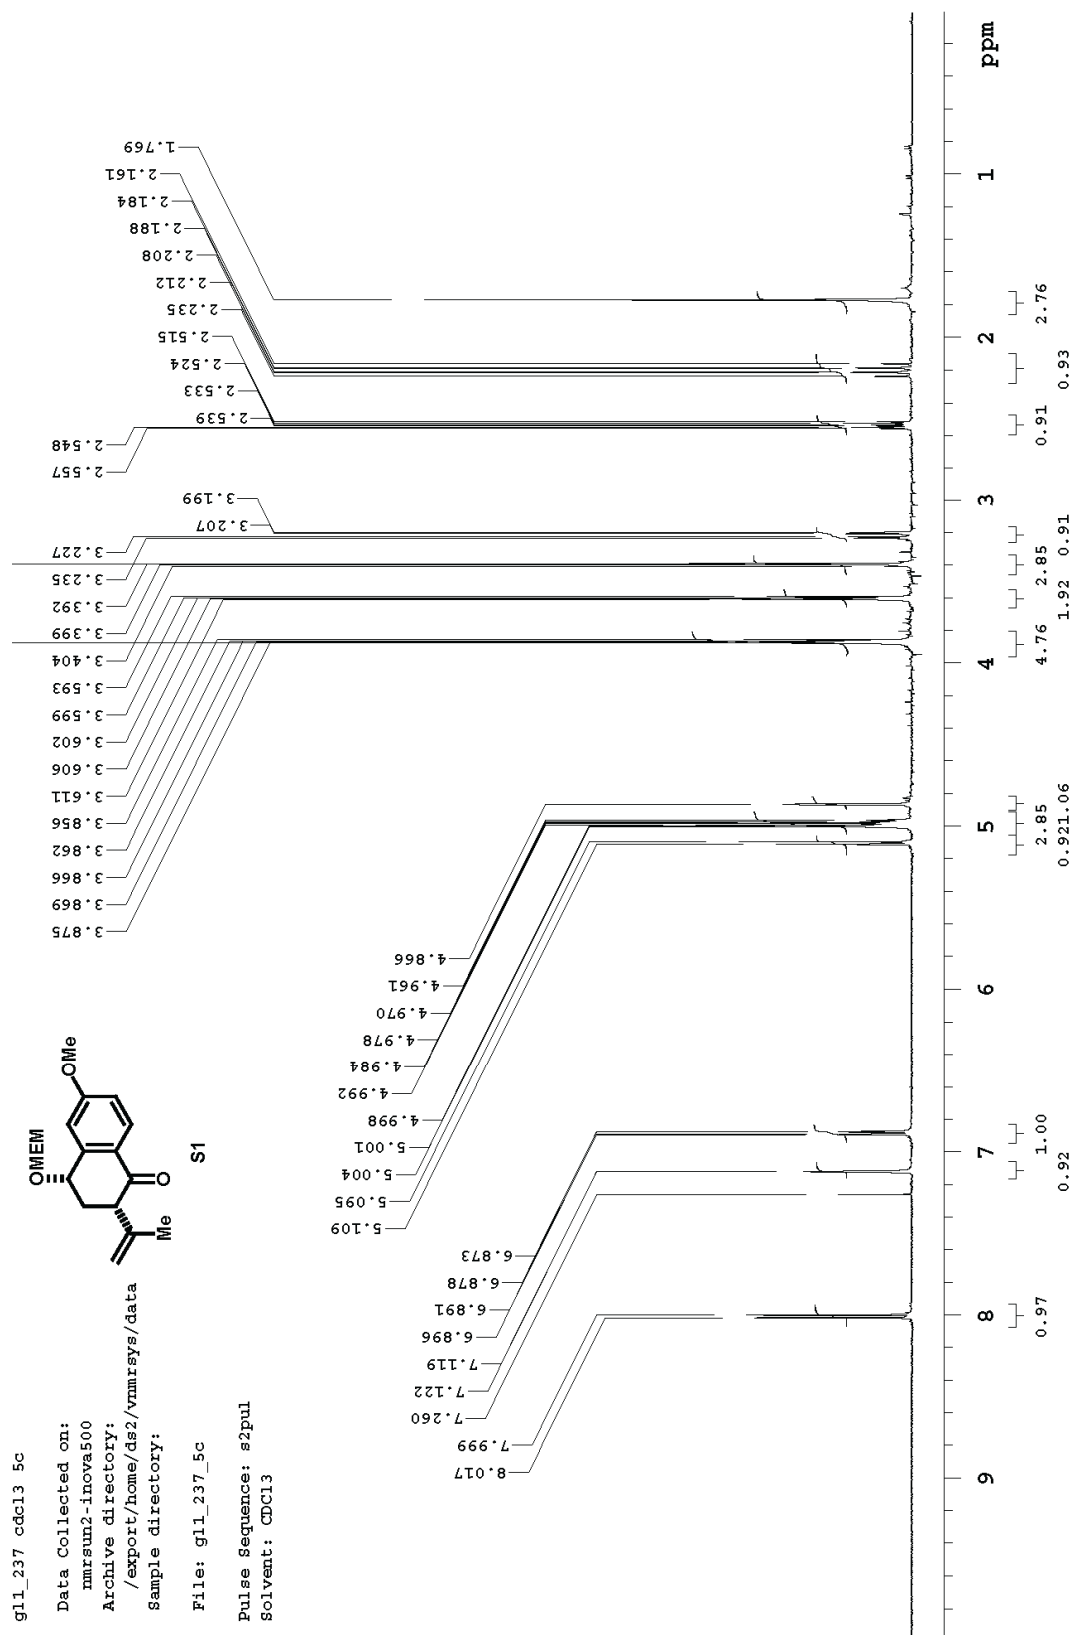

Supplement: Supplementary file 1 [file 4676893]
